# Supplementary material for: Root-Associated Bacterial Community Shifts in Hydroponic Lettuce Cultured with Urine-Derived Fertilizer
Source: MDPI journal article supplement (doi:10.3390/microorganisms9061326), 2021-06-18
Supplement: s1 [file s1]

**Supplementary Material***Figures*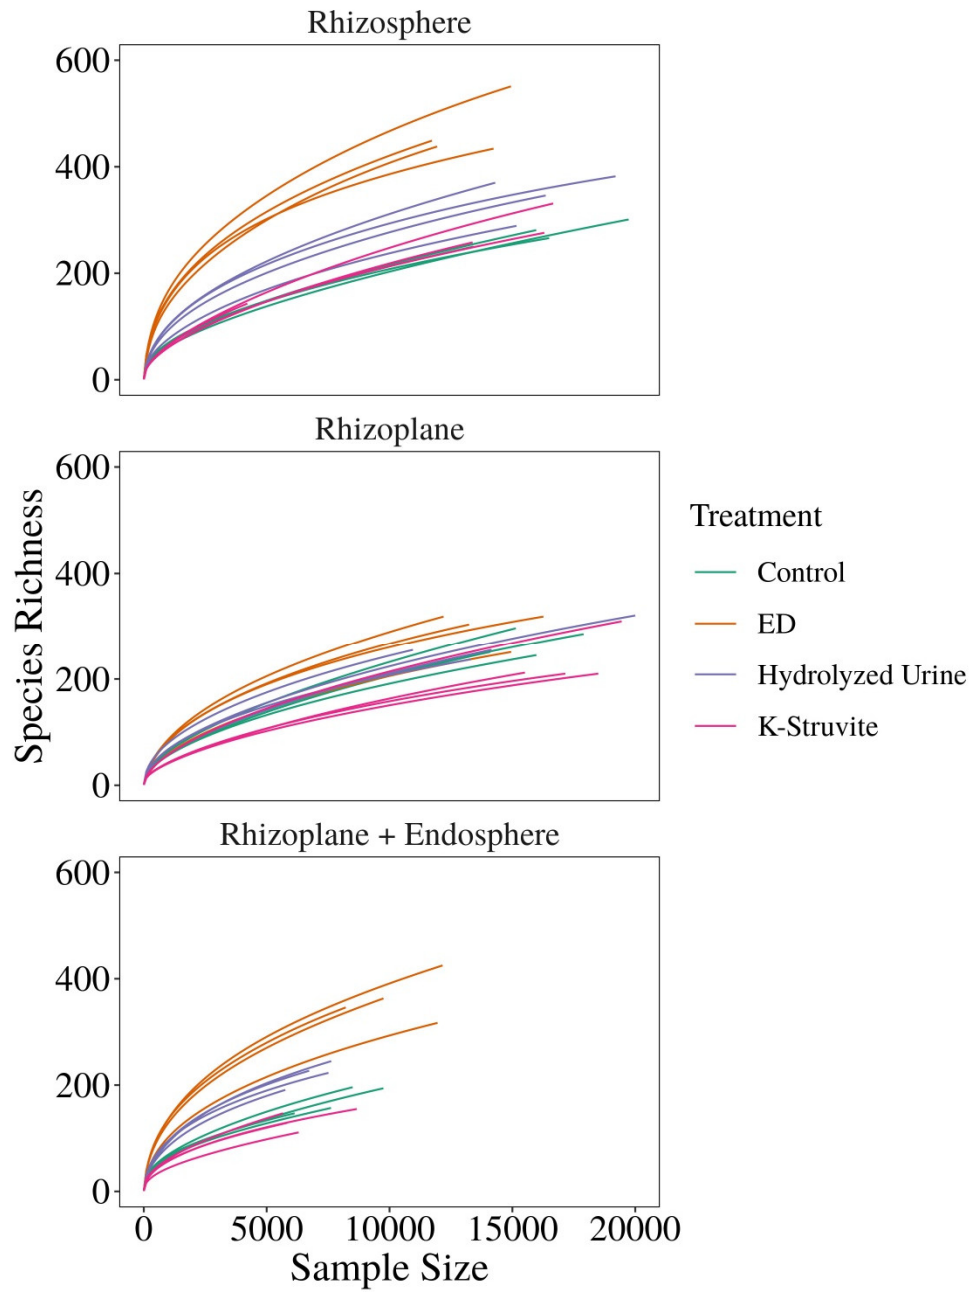

**Figure S1.** Rarefaction curves displaying the number of operational taxonomic units (OTU) against the depth of each of the urine-derived fertilizer samples divided by root zone (ED: electro dialysis concentrate).

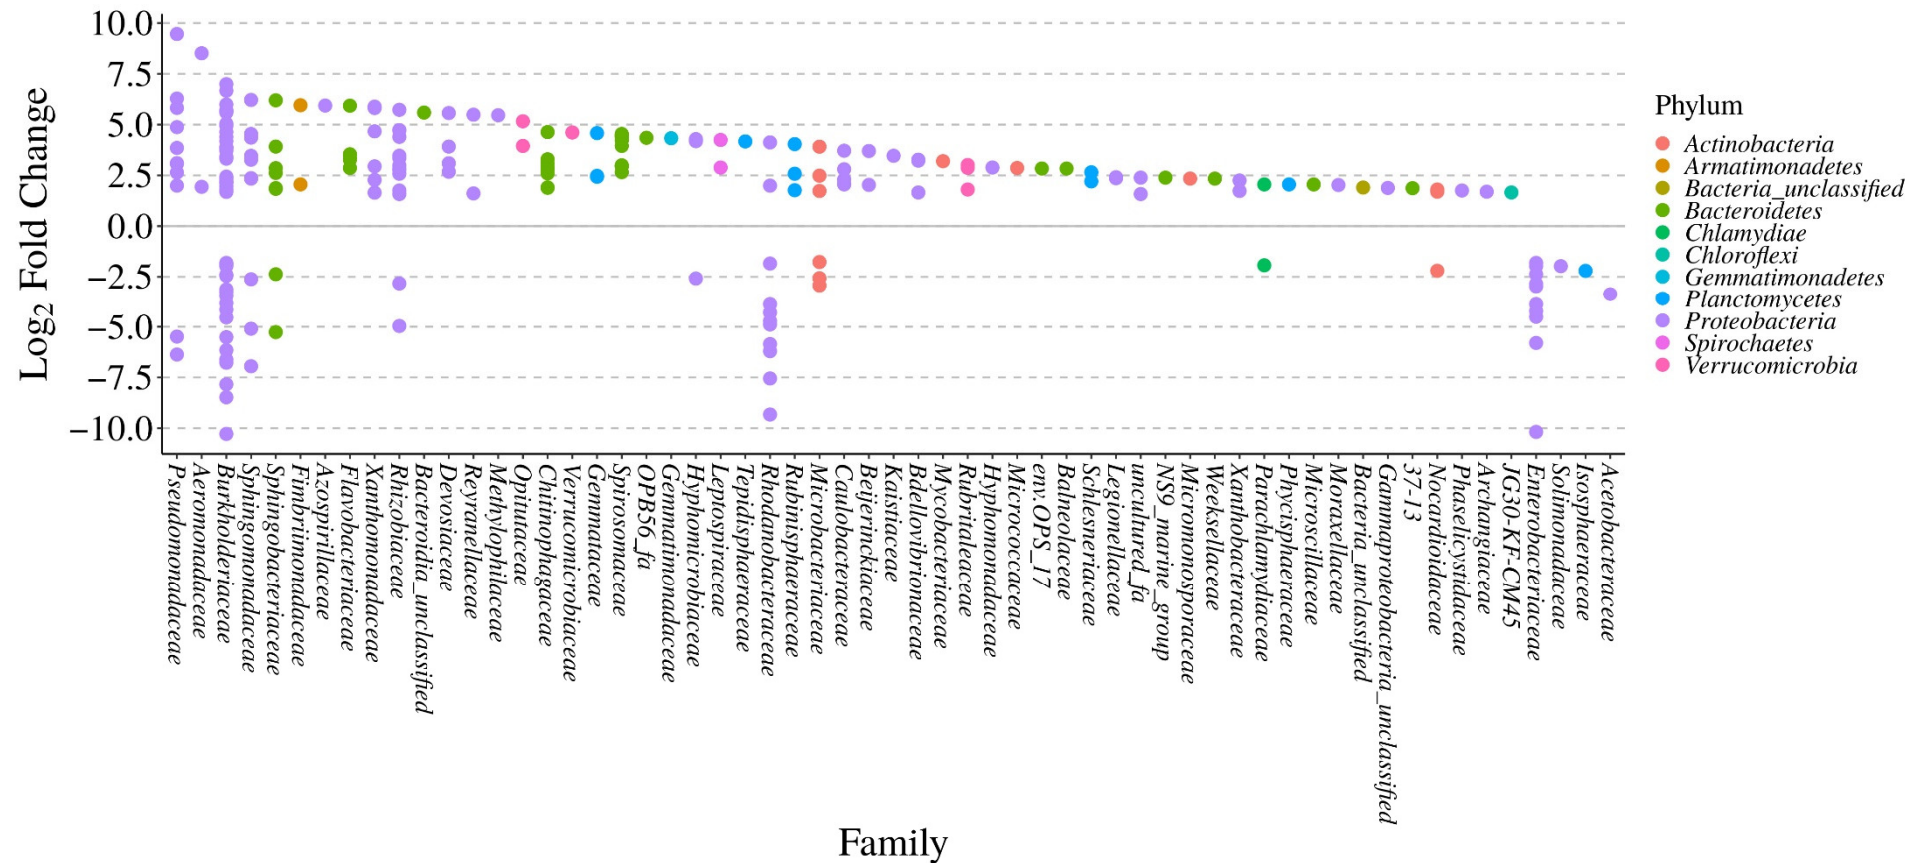

**Figure S2.** Differentially abundant operational taxonomic units (OTU) between the electro dialysis (ED) concentrate and NPK control-treated lettuce root-associated bacterial community samples. Taxa with positive log<sub>2</sub> fold change values are more abundant in the ED concentrate treatment. Taxa with negative log<sub>2</sub> fold change values are more abundant in the NPK control treatment. Significance at  $\alpha = 0.01$ . N per urine-derived fertilizer treatment = 12.

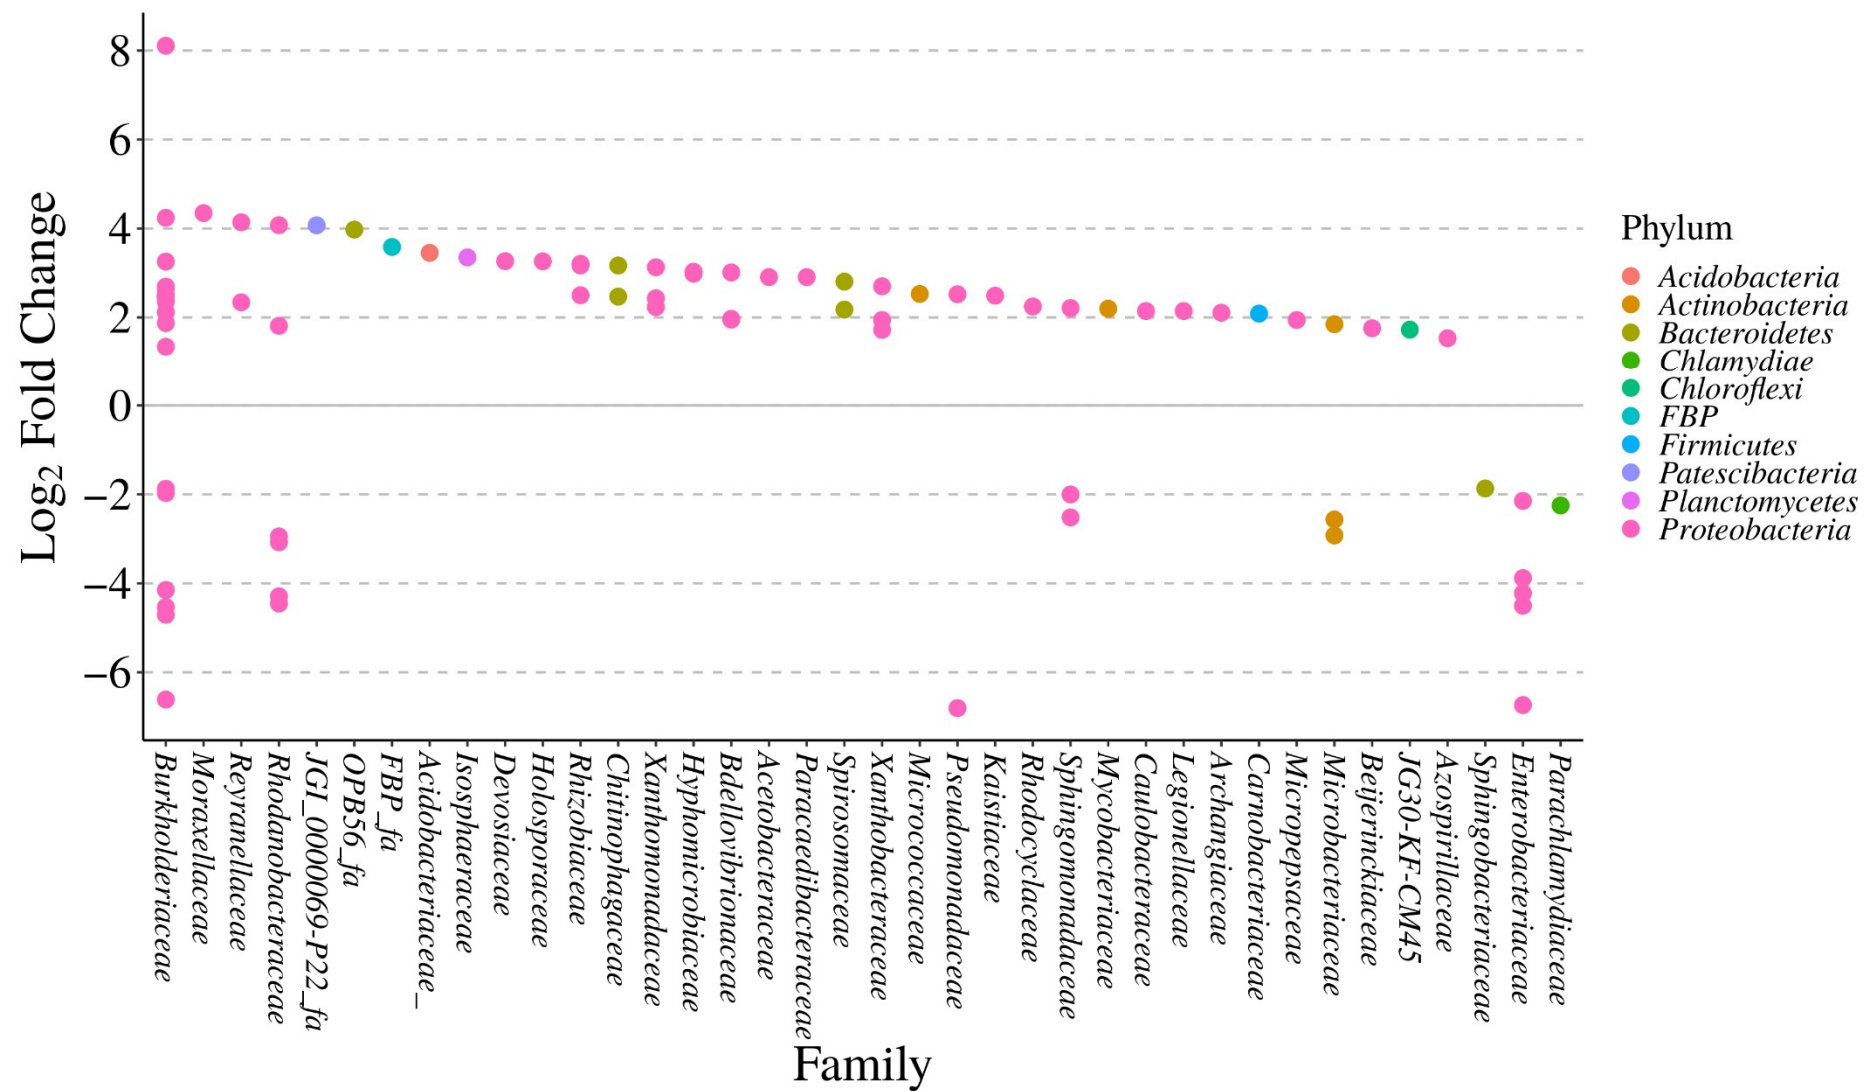

**Figure S3.** Differentially abundant operational taxonomic units (OTU) between the hydrolyzed urine and NPK control-treated lettuce root-associated bacterial community samples. Taxa with positive log<sub>2</sub> fold change values are significantly more abundant in the hydrolyzed urine treatment. Taxa with negative log<sub>2</sub> fold change values are significantly more abundant in the NPK control treatment. Significance at  $\alpha = 0.01$ . N per urine-derived fertilizer treatment = 12.

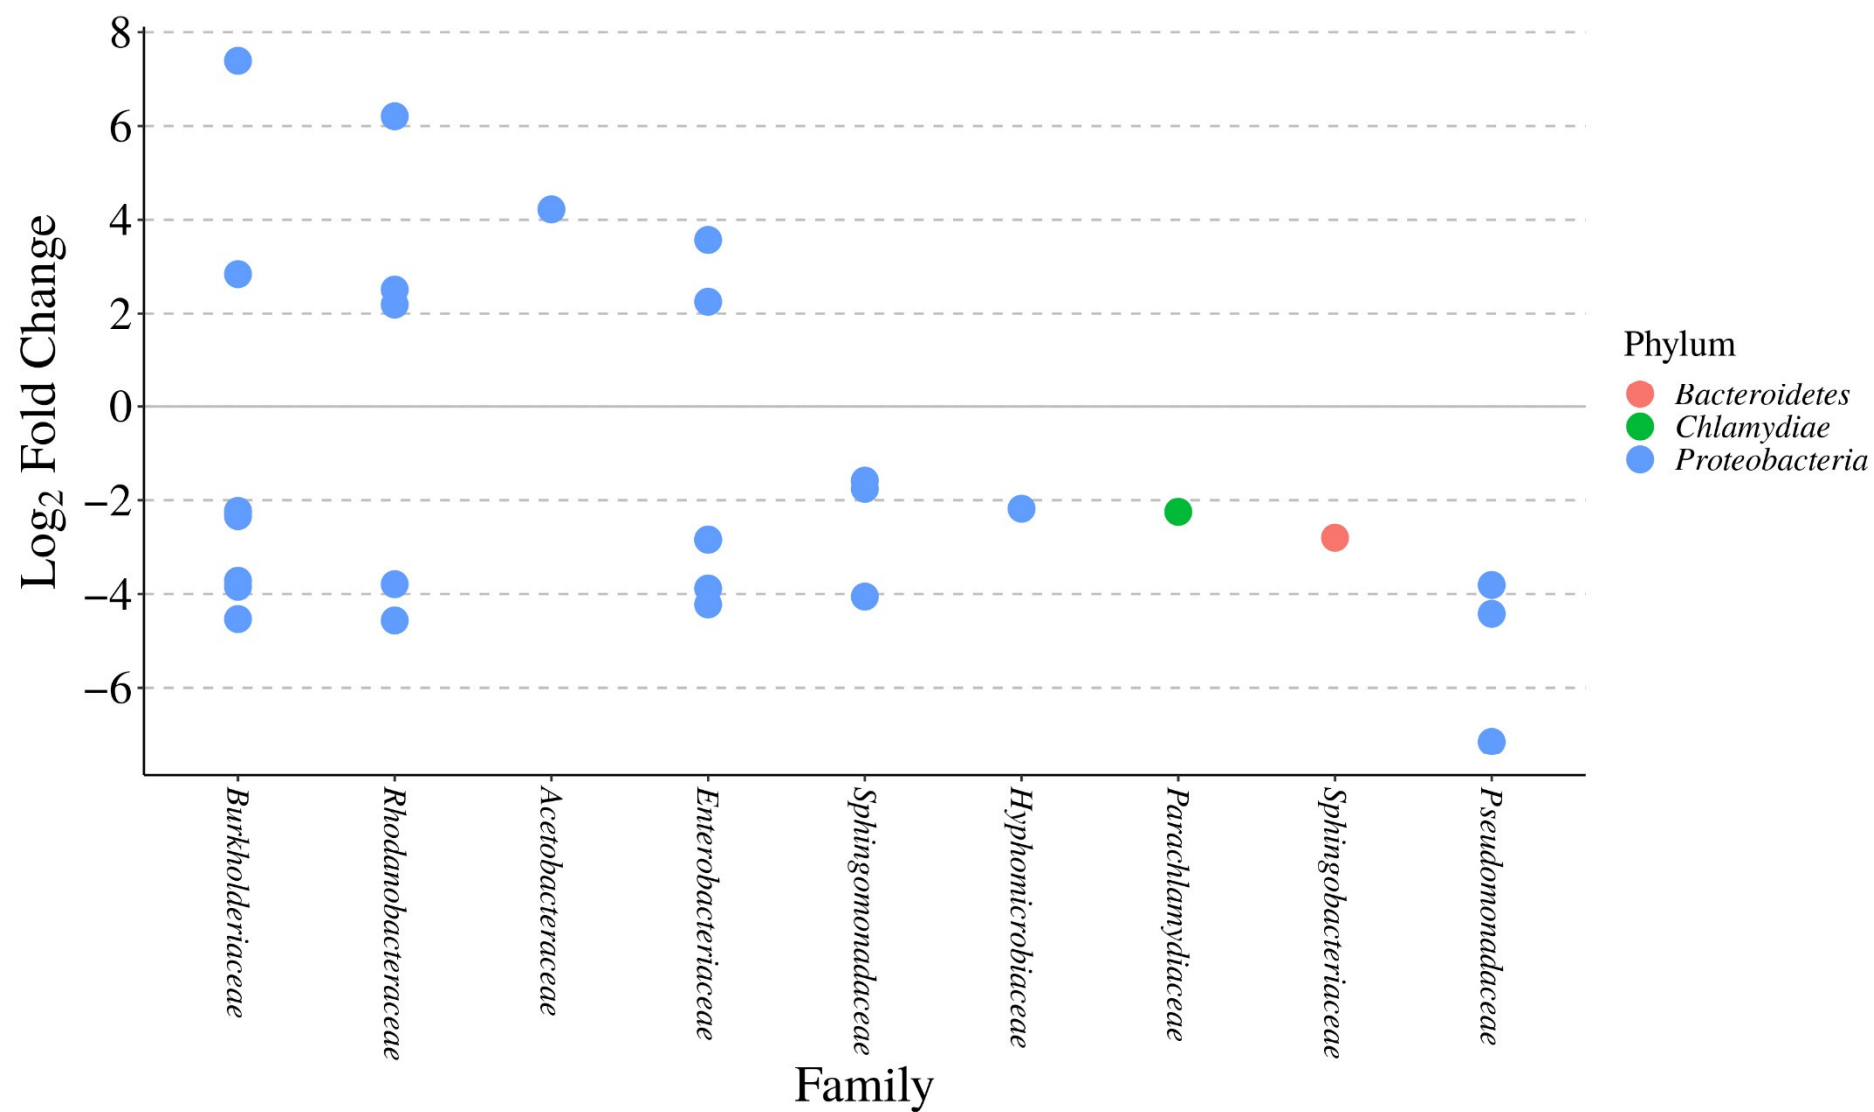

**Figure S4.** Differentially abundant operational taxonomic units (OTU) between the K-struvite and NPK control-treated lettuce root-associated bacterial community samples. Taxa with positive log<sub>2</sub> fold change values are significantly more abundant in the K-struvite treatment. Taxa with negative log<sub>2</sub> fold change values are significantly more abundant in the NPK control treatment. Significance at  $\alpha = 0.01$ . N per urine-derived fertilizer treatment = 12.

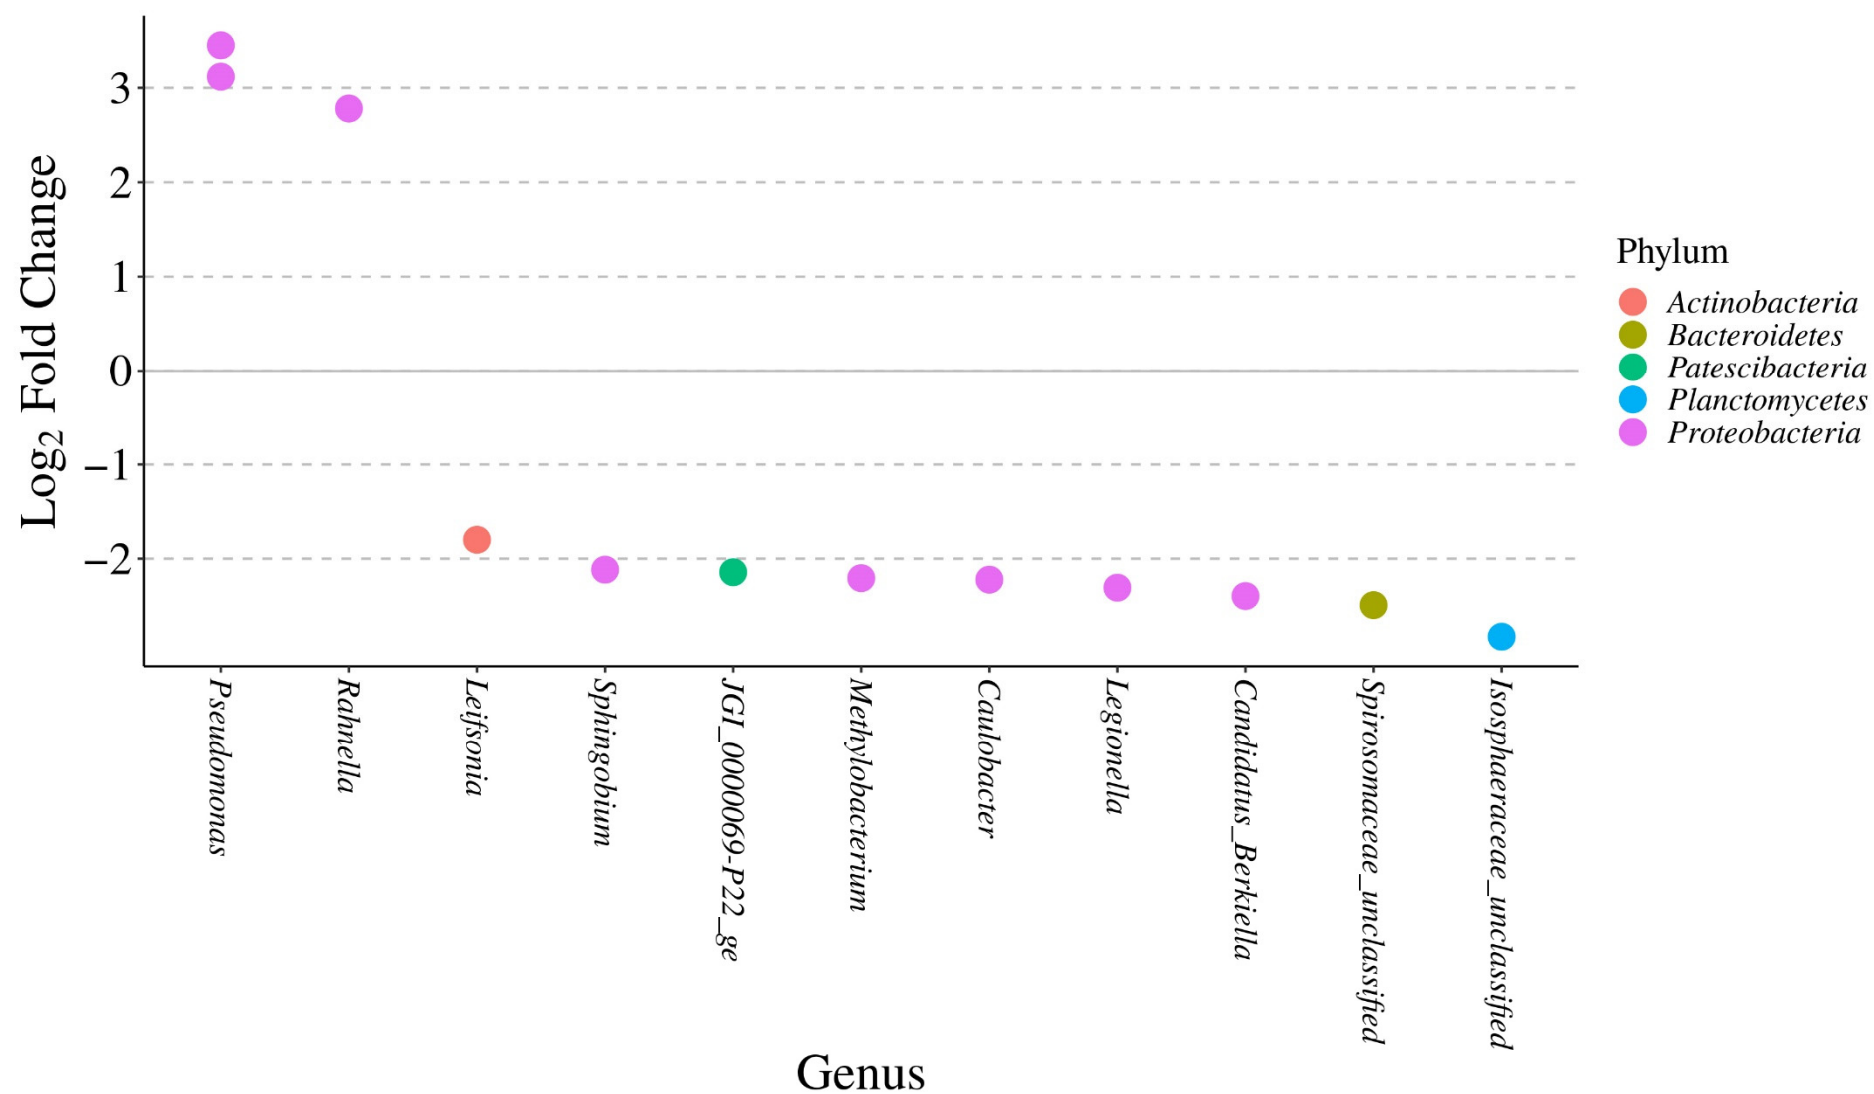

**Figure S5.** Differentially abundant operational taxonomic units (OTU) between the rhizoplane and rhizosphere lettuce root-associated bacterial community samples. Taxa with positive log<sub>2</sub> fold change values are significantly more abundant in the rhizoplane root zone. Taxa with negative log<sub>2</sub> fold change values are significantly more abundant in the rhizosphere root zone. Significance at  $\alpha = 0.01$ . n per root zone = 16.

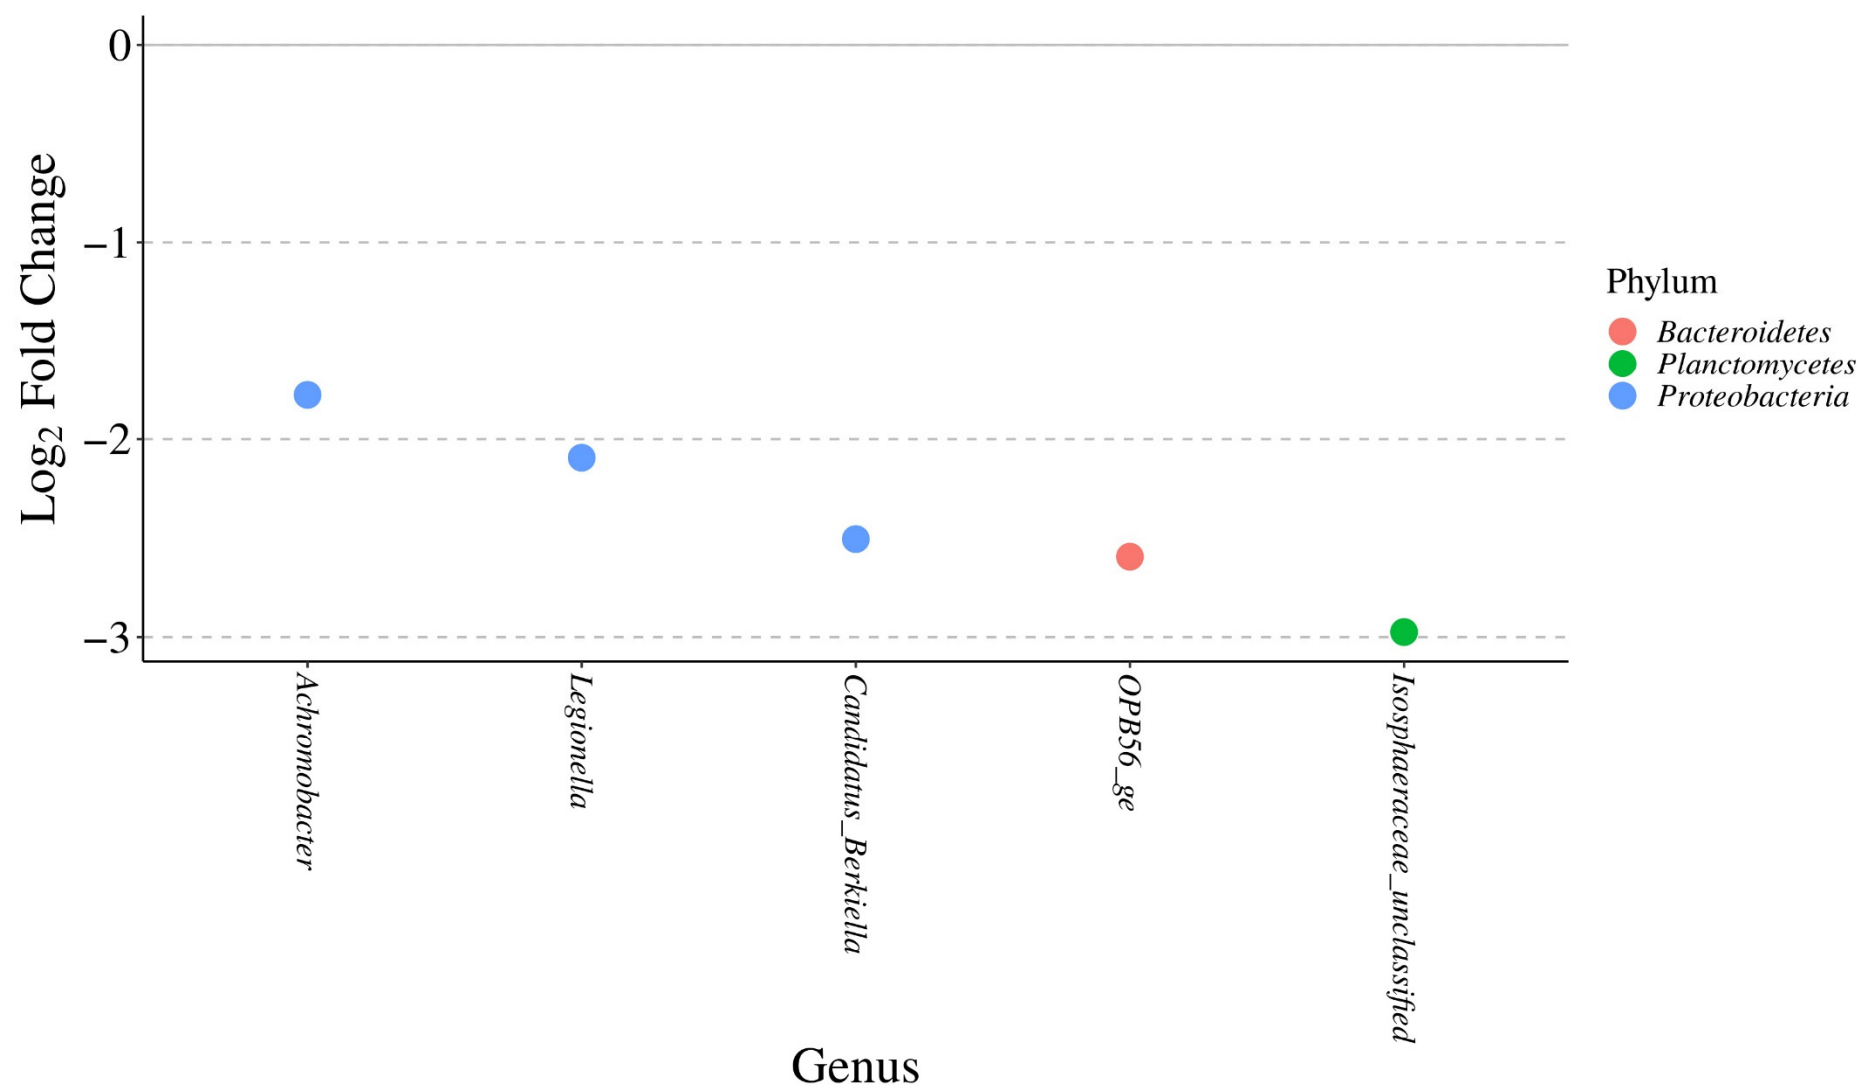

**Figure S6.** Differentially abundant operational taxonomic units (OTU) between the combined rhizoplane/endosphere and rhizosphere lettuce root-associated bacterial community samples. Taxa with positive log<sub>2</sub> fold change values are significantly more abundant in the combined rhizoplane/endosphere root zone. Taxa with negative log<sub>2</sub> fold change values are significantly more abundant in the rhizosphere root zone. Significance at  $\alpha = 0.01$ . n per root zone = 16.

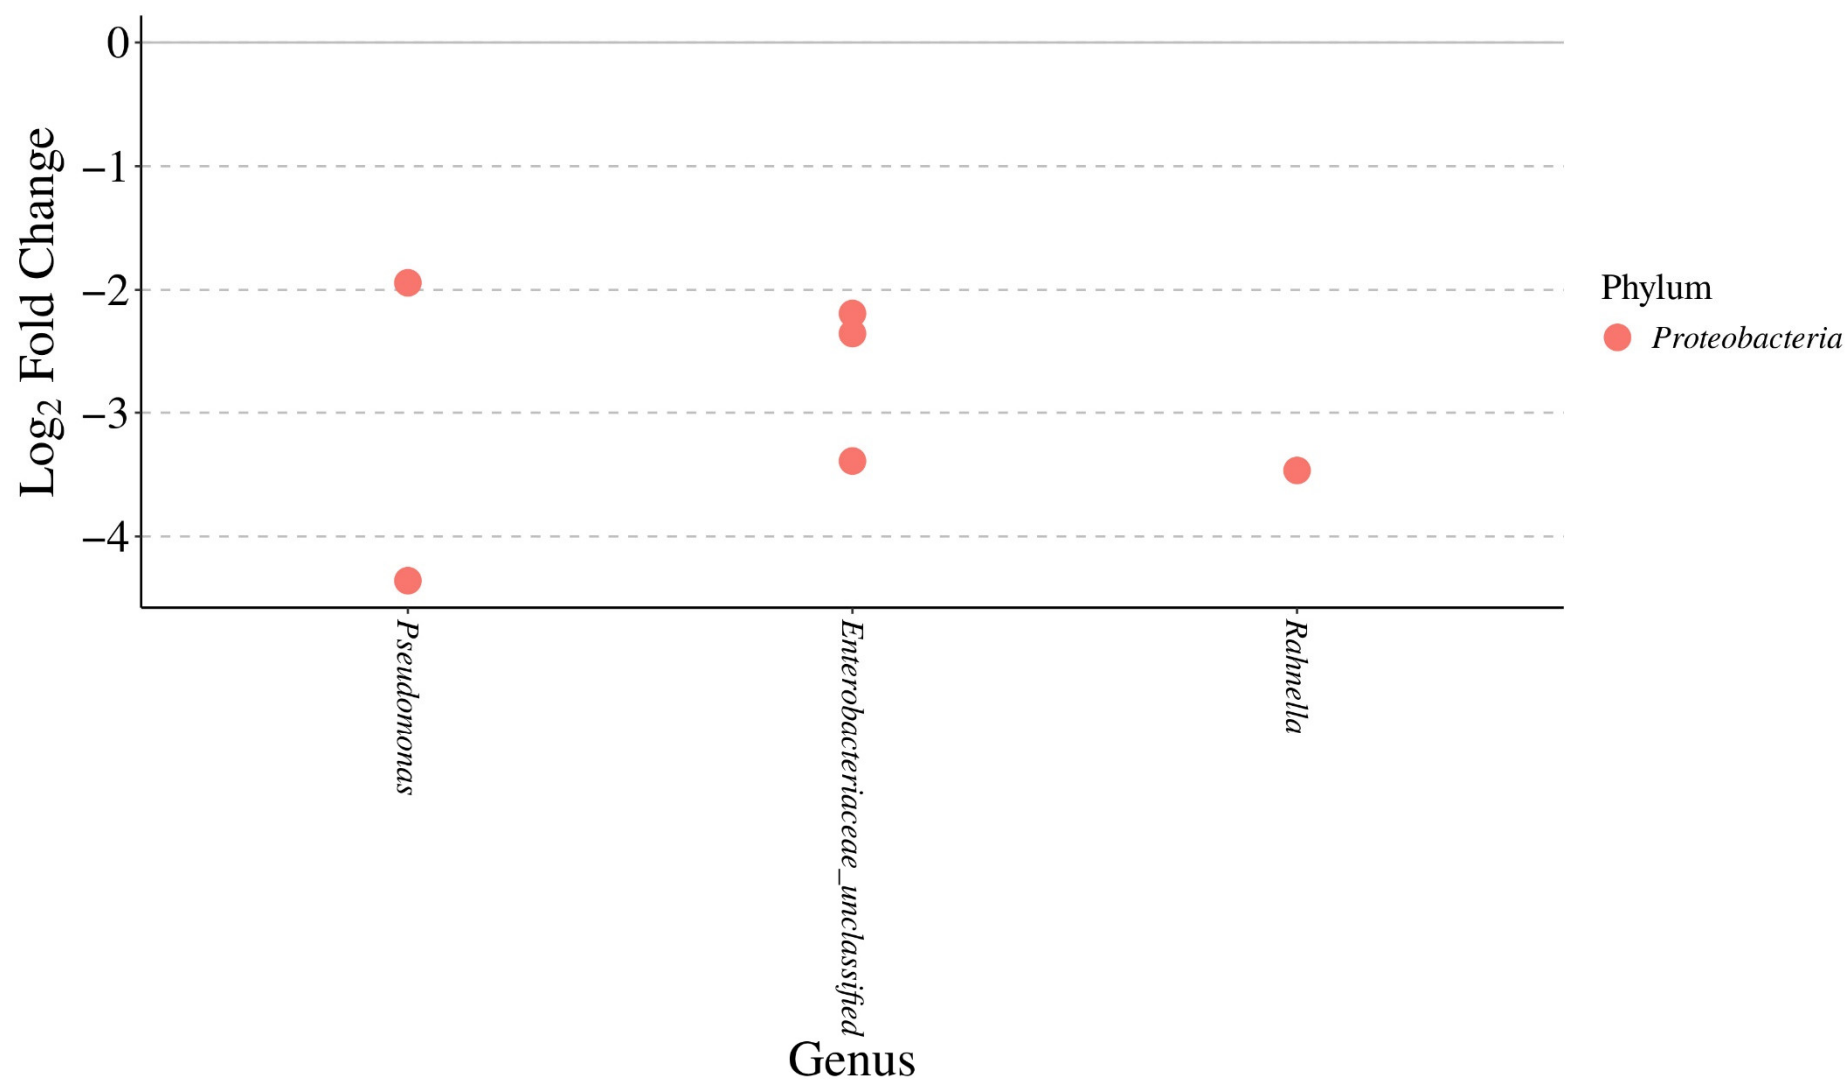

**Figure S7.** Differentially abundant operational taxonomic units (OTU) between the combined rhizoplane/endosphere and rhizoplane lettuce root-associated bacterial community samples. Taxa with positive log<sub>2</sub> fold change values are significantly more abundant in the combined rhizoplane/endosphere root zone. Taxa with negative log<sub>2</sub> fold change values are significantly more abundant in the rhizoplane root zone. Significance at  $\alpha = 0.01$ . n per root zone = 16.



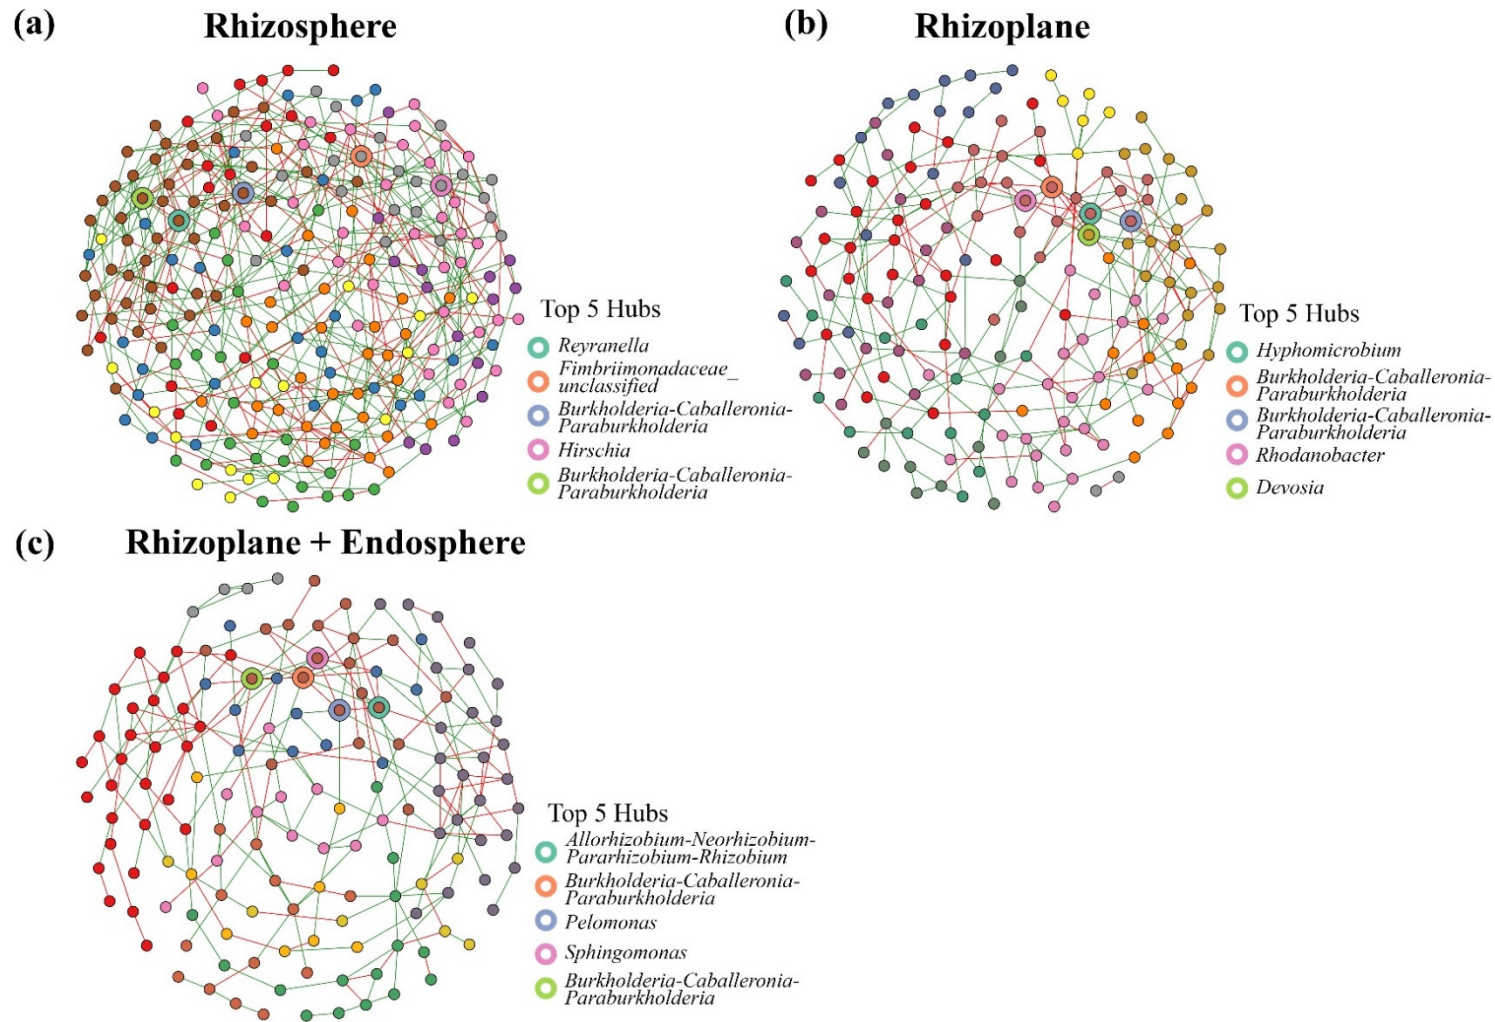

**Figure S8.** Lettuce root-associated bacterial community networks grouped per root zone: (a) Rhizosphere network with 237 nodes, 555 edges (367 positives and 188 negatives), and 9 clusters; (b) Rhizoplane network with 173 nodes, 301 edges (204 positives and 97 negatives), and 11 clusters; (c) Combined rhizoplane/endosphere network with 145 nodes, 237 edges (142 positives and 95 negatives), and 10 clusters. Nodes are colored by cluster (clusters were determined using the fast greedy modularity optimization algorithm). The top 5 hub nodes are indicated by the colored borders (hubs were determined using Kleinberg's hub centrality scores). The green and red edges indicate a positive or negative correlation between the network nodes, respectively.



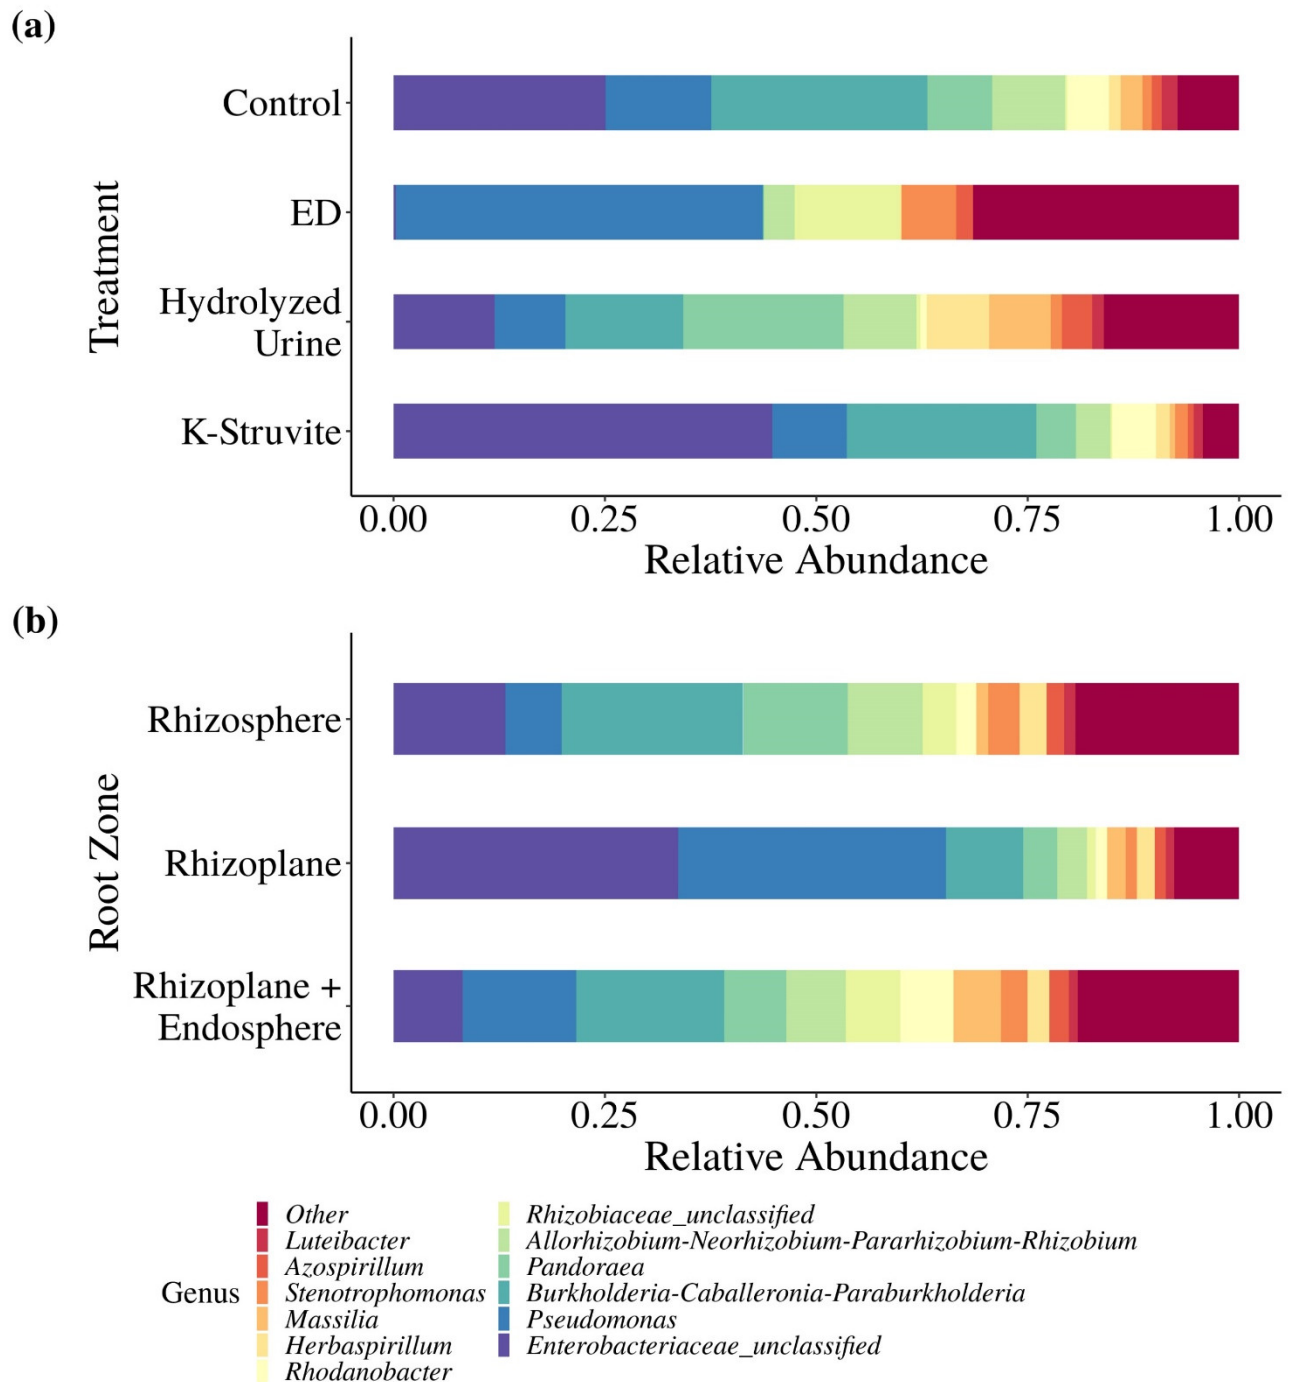

**Figure S9.** Relative abundance of the top 12 genera present in the lettuce root-associated bacterial community samples grouped per (a) urine-derived fertilizer treatment and (b) root zone. The top 12 genera were determined based on their combined relative abundance across all 48 root samples. All other genera were labeled as 'Other.' N per urine-derived fertilizer treatment = 12 and n per root zone = 16 (ED: electro dialysis concentrate).

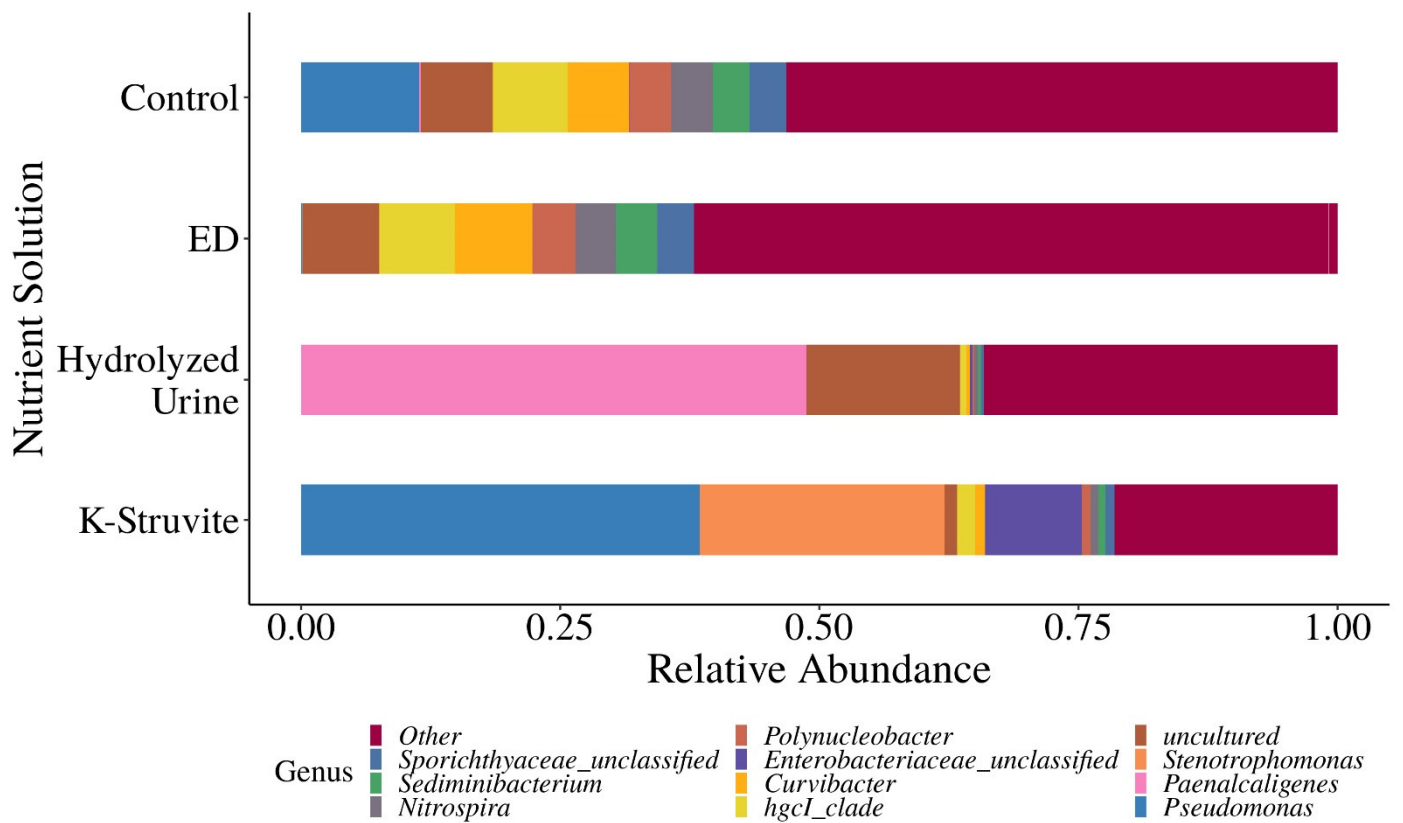

**Figure S10.** Relative abundance of the top 12 genera in the different urine-derived fertilizer's nutrient solutions before application. The top 12 genera were determined based on their combined relative abundance across all four nutrient solution samples. All other genera were labeled as 'Other.' n per nutrient solution = 1 (ED: electrodialysis concentrate).

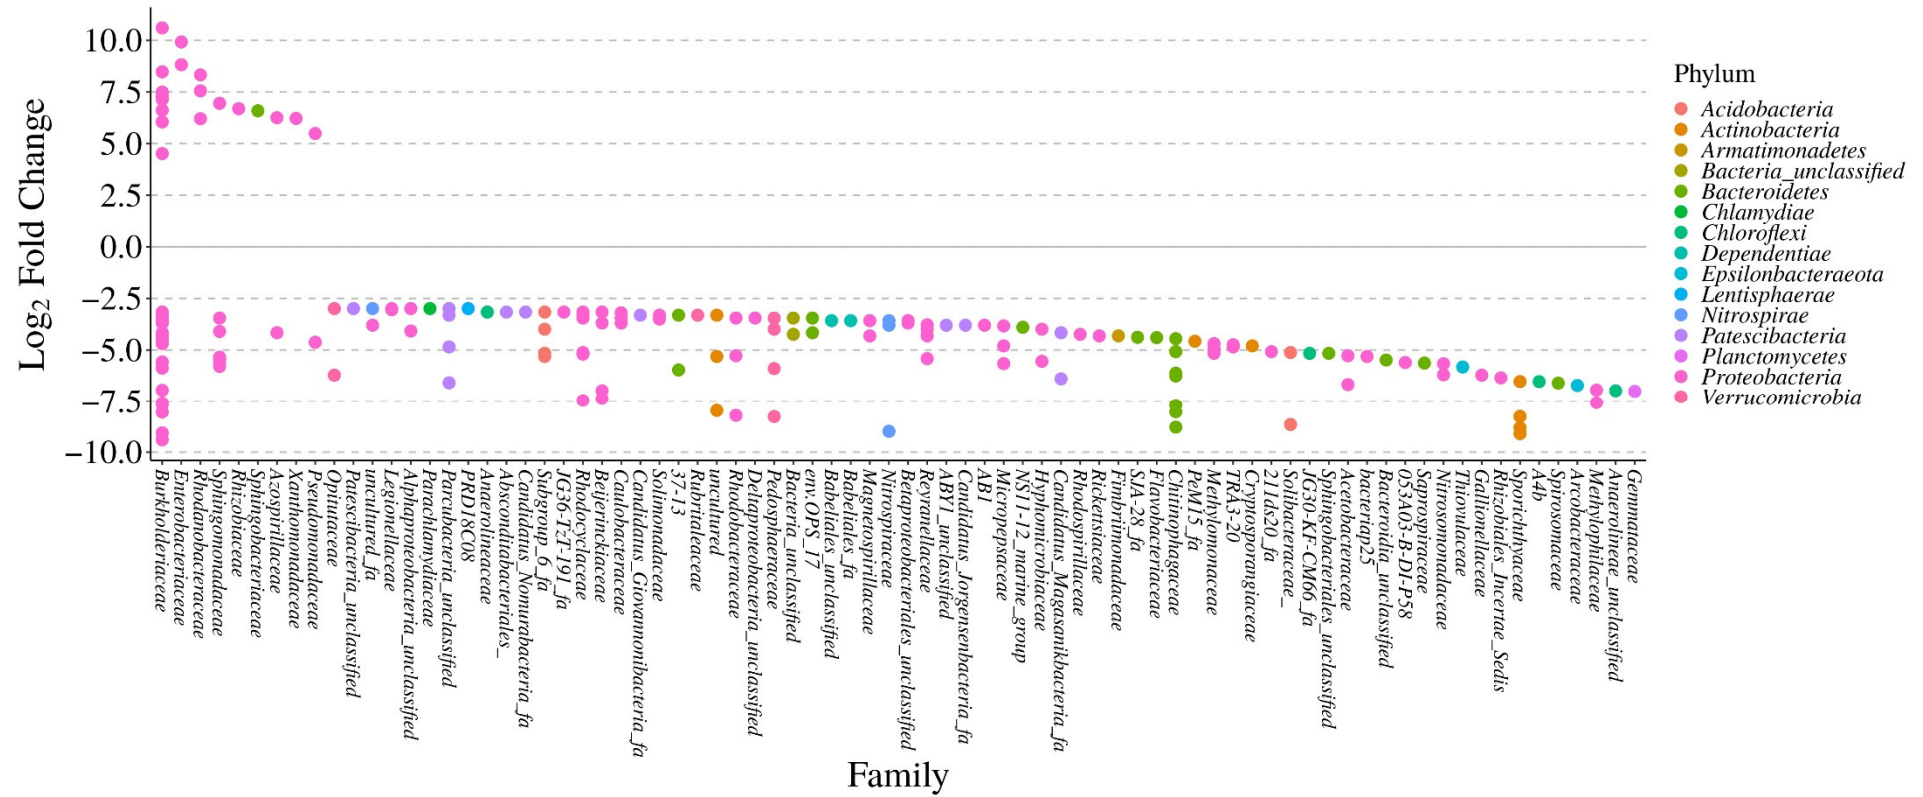

**Figure S11.** Differentially abundant operational taxonomic units (OTU) between the NPK control-treated lettuce root-associated bacterial community samples and the NPK control nutrient solution. Taxa with positive log<sub>2</sub> fold change values are more abundant in the root samples. Taxa with negative log<sub>2</sub> fold change values are more abundant in the nutrient solution. Significance at  $\alpha = 0.01$ .

**Figure S12.** Differentially abundant operational taxonomic units (OTU) between the electrodialysis (ED) concentrate-treated lettuce root-associated bacterial community samples and the ED concentrate nutrient solution. Taxa with positive log<sub>2</sub> fold change values are more abundant in the root samples. Taxa with negative log<sub>2</sub> fold change values are more abundant in the nutrient solution. Significance at  $\alpha = 0.01$ .

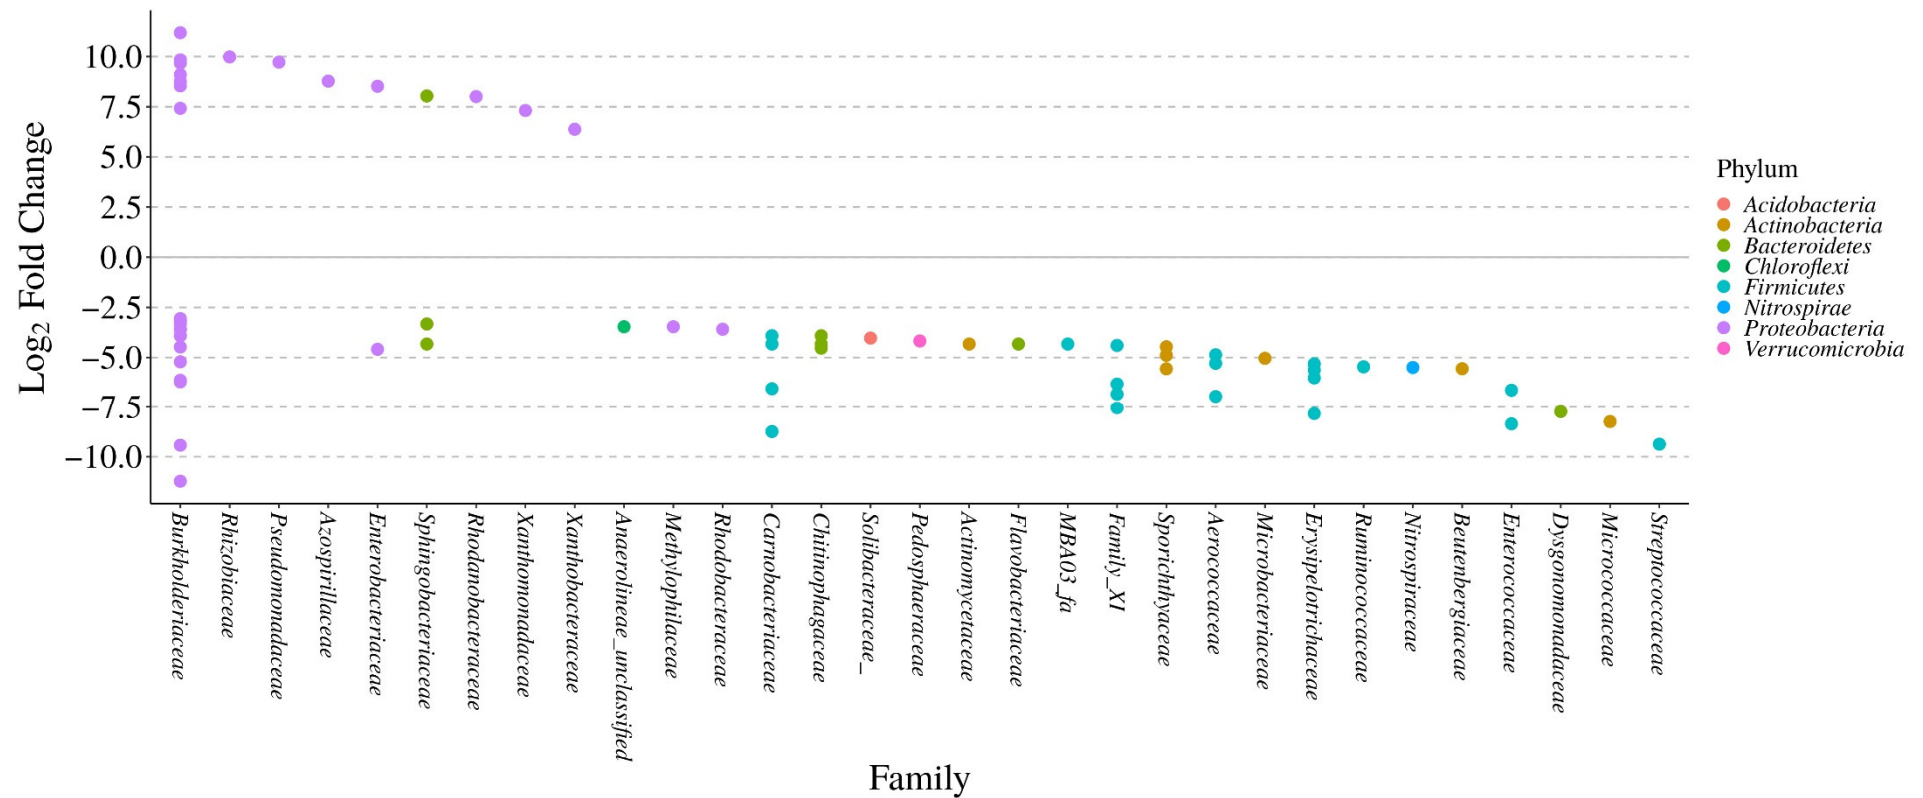

**Figure S13.** Differentially abundant operational taxonomic units (OTU) between the hydrolyzed urine-treated lettuce root-associated bacterial community samples and the hydrolyzed urine nutrient solution. Taxa with positive log<sub>2</sub> fold change values are more abundant in the root samples. Taxa with negative log<sub>2</sub> fold change values are more abundant in the nutrient solution. Significance at  $\alpha = 0.01$ .

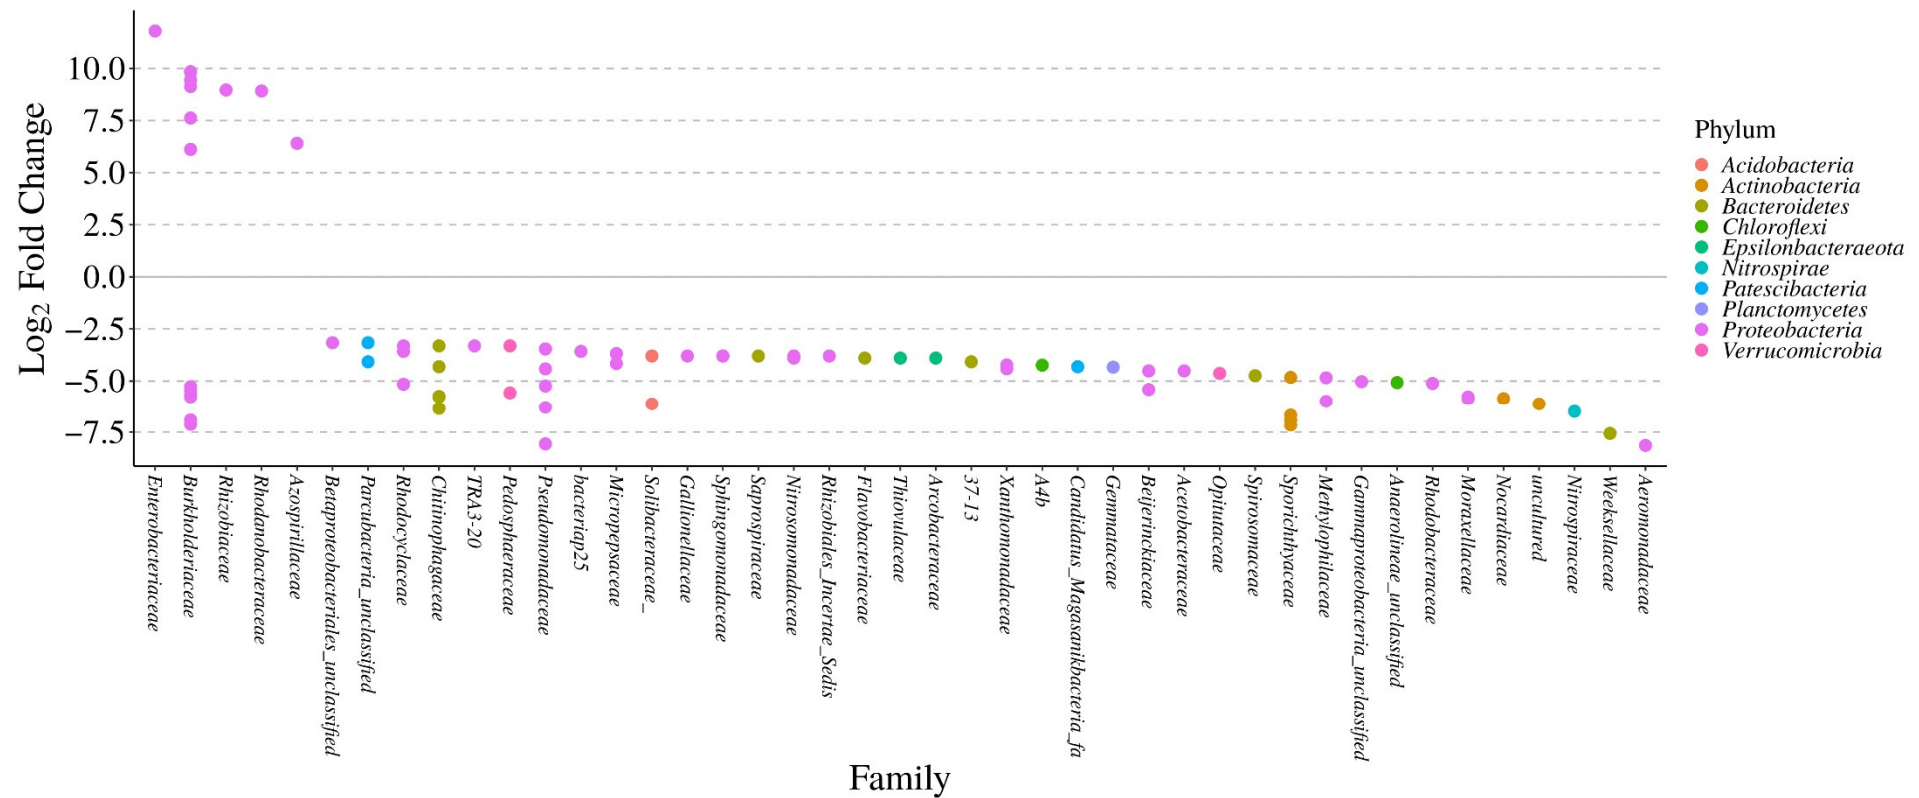

**Figure S14.** Differentially abundant operational taxonomic units (OTU) between the K-struvite-treated lettuce root-associated bacterial community samples and the K-struvite nutrient solution. Taxa with positive log<sub>2</sub> fold change values are more abundant in the root samples. Taxa with negative log<sub>2</sub> fold change values are more abundant in the nutrient solution. Significance at  $\alpha = 0.01$ .



## Tables

**Table S1.** Lettuce leaf number, leaf area, fresh weight (FW), dry weight (DW), and dry matter content (% DM) regarding the urine-derived fertilizer treatments. Asterisks indicate global level of significance:  $p < 0.001$  (\*\*\*). Different letters within each column indicate significant differences according to Duncan's multiple range test ( $\alpha = 0.05$ ). All data are expressed as mean  $\pm$  standard error,  $n = 4$  (ED: electrodialysis, TE: trace elements).

| Treatments                  | Leaf Number<br>(no. plant <sup>-1</sup> ) | Leaf Area<br>(cm <sup>2</sup> .plant <sup>-1</sup> ) | FW<br>(g.plant <sup>-1</sup> ) | DW<br>(g.plant <sup>-1</sup> ) | Dry Matter Content<br>(% DM) |
|-----------------------------|-------------------------------------------|------------------------------------------------------|--------------------------------|--------------------------------|------------------------------|
| NPK control (20-10-20 + TE) | 15 $\pm$ 0.37 ab                          | 1178 $\pm$ 23.31 a                                   | 43.25 $\pm$ 1.36 a             | 3.22 $\pm$ 0.07 a              | 7.47 $\pm$ 0.16 b            |
| ED Concentrate              | 14 $\pm$ 0.34 b                           | 841 $\pm$ 13.98 b                                    | 30.16 $\pm$ 0.72 b             | 2.33 $\pm$ 0.04 b              | 7.72 $\pm$ 0.17 b            |
| Hydrolyzed Urine            | 9 $\pm$ 0.53 c                            | 283 $\pm$ 17.82 c                                    | 8.30 $\pm$ 0.95 c              | 0.73 $\pm$ 0.10 c              | 8.72 $\pm$ 0.20 a            |
| K-Struvite                  | 16 $\pm$ 0.64 a                           | 1114 $\pm$ 33.71 a                                   | 41.96 $\pm$ 0.34 a             | 3.08 $\pm$ 0.08 a              | 7.35 $\pm$ 0.13 b            |
| Significance                | ***                                       | ***                                                  | ***                            | ***                            | ***                          |

**Table S2.** Lettuce leaf photosynthetic pigments and stress metabolites in respect to the urine-derived fertilizer treatments. The photosynthetic pigment parameters are SPAD index, Chlorophyll a (Chla), chlorophyll b (Chlb), total chlorophylls (Chla+b), and total carotenoids. The stress metabolite parameters are total antioxidant capacity (TAC) and total phenolic content (TPC). Asterisks indicate global level of significance:  $p < 0.05$  (\*) and  $p < 0.001$  (\*\*\*). Different letters within each column indicate significant differences according to Duncan's multiple range test ( $\alpha = 0.05$ ). All data are expressed as mean  $\pm$  standard error,  $n = 3$  to 4. FW = fresh weight, L-AAE = L-ascorbic acid equivalents, and GAE = gallic acid equivalents (ED: electrodialysis, TE: trace elements).

| Treatments                  | SPAD<br>Index      | Chla<br>(mg.kg <sup>-1</sup> FW) | Chlb<br>(mg.kg <sup>-1</sup> FW) | Chla+b<br>(mg.kg <sup>-1</sup> FW) | Total Carotenoids<br>(mg.kg <sup>-1</sup> FW) | TAC<br>( $\mu$ mol L-AAE.100g <sup>-1</sup> FW) | TPC<br>( $\mu$ g GAE.100g <sup>-1</sup> FW) |
|-----------------------------|--------------------|----------------------------------|----------------------------------|------------------------------------|-----------------------------------------------|-------------------------------------------------|---------------------------------------------|
| NPK control (20-10-20 + TE) | 24.95 $\pm$ 0.30 b | 148.1 $\pm$ 2.1 ab               | 45.90 $\pm$ 1.2 a                | 194.0 $\pm$ 3.3 ab                 | 44.30 $\pm$ 0.7 ab                            | 31.46 $\pm$ 0.23 c                              | 836.5 $\pm$ 10 b                            |
| ED Concentrate              | 20.33 $\pm$ 0.34 c | 115.4 $\pm$ 4.4 b                | 31.27 $\pm$ 1.0 b                | 146.6 $\pm$ 4.6 b                  | 36.03 $\pm$ 1.9 b                             | 35.32 $\pm$ 0.28 a                              | 1083.4 $\pm$ 18 a                           |
| Hydrolyzed Urine            | 26.88 $\pm$ 0.33 a | 177.1 $\pm$ 20.4 a               | 47.93 $\pm$ 5.3 a                | 225.1 $\pm$ 25.7 a                 | 54.07 $\pm$ 5.8 a                             | 33.27 $\pm$ 0.15 b                              | 863.4 $\pm$ 25 b                            |
| K-Struvite                  | 23.90 $\pm$ 0.41 b | 145.8 $\pm$ 7.3 ab               | 42.67 $\pm$ 2.1 a                | 188.5 $\pm$ 9.4 ab                 | 45.77 $\pm$ 2.5 ab                            | 28.71 $\pm$ 0.79 d                              | 881 $\pm$ 16 b                              |
| Significance                | ***                | *                                | *                                | *                                  | *                                             | ***                                             | ***                                         |

**Table S3.** Lettuce organic acid content in respect to the urine-derived fertilizer treatments. Asterisks indicate global level of significance:  $p < 0.01$  (\*\*) and  $p < 0.001$  (\*\*\*). Different letters within each column indicate significant differences according to Duncan's multiple range test ( $\alpha = 0.05$ ). All data are expressed as mean  $\pm$  standard error,  $n = 4$ . DW = dry weight (ED: electrodialysis, TE: trace elements).

| Treatments                  | Malate<br>(mg.kg <sup>-1</sup> DW) | Tartrate<br>(mg.kg <sup>-1</sup> DW) | Oxalate<br>(mg.kg <sup>-1</sup> DW) | Citrate<br>(mg.kg <sup>-1</sup> DW) | Isocitrate<br>(mg.kg <sup>-1</sup> DW) |
|-----------------------------|------------------------------------|--------------------------------------|-------------------------------------|-------------------------------------|----------------------------------------|
| NPK control (20-10-20 + TE) | 23.09 $\pm$ 1.00 b                 | 2.70 $\pm$ 0.19 a                    | 1.48 $\pm$ 0.02 b                   | 7.32 $\pm$ 0.36 b                   | 0.15 $\pm$ 0.01 bc                     |
| ED Concentrate              | 65.55 $\pm$ 5.09 a                 | 3.21 $\pm$ 0.30 a                    | 2.07 $\pm$ 0.25 a                   | 17.91 $\pm$ 1.43 a                  | 0.51 $\pm$ 0.04 a                      |
| Hydrolyzed Urine            | 3.25 $\pm$ 0.15 c                  | 1.69 $\pm$ 0.21 b                    | 0.71 $\pm$ 0.05 c                   | 2.85 $\pm$ 0.59 c                   | 0.08 $\pm$ 0.02 c                      |
| K-struvite                  | 18.31 $\pm$ 2.21 b                 | 2.54 $\pm$ 0.25 a                    | 1.68 $\pm$ 0.09 ab                  | 8.07 $\pm$ 0.84 b                   | 0.16 $\pm$ 0.02 b                      |
| Significance                | ***                                | **                                   | ***                                 | ***                                 | ***                                    |



**Table S5.** PerMANOVA with Holm adjustment for multiple comparisons on Bray-Curtis distances to determine differences in lettuce root-associated bacterial community composition ( $\beta$ -diversity) and homogeneity of variances explained by the urine-derived fertilizers. Asterisks indicate level of significance:  $p < 0.05$  (\*),  $p < 0.01$  (\*\*), and  $p < 0.0001$  (\*\*\*\*). n.s. = non significant (ED: electro dialysis concentrate).

|          |                                | $\beta$ -diversity |                |      | Homogeneity of Variances |
|----------|--------------------------------|--------------------|----------------|------|--------------------------|
|          |                                | F                  | R <sup>2</sup> | p    |                          |
| Global   |                                | 18.78              | 0.56           | **** | n.s.                     |
| Pairwise | NPK control - ED               | 33.64              | 0.60           | **   | n.s.                     |
|          | NPK control - Hydrolyzed Urine | 11.00              | 0.33           | **   | n.s.                     |
|          | NPK control - K-Struvite       | 3.27               | 0.13           | *    | *                        |
|          | ED - Hydrolyzed Urine          | 25.67              | 0.54           | **   | n.s.                     |
|          | ED - K-Struvite                | 27.27              | 0.55           | **   | n.s.                     |
|          | Hydrolyzed Urine - K-Struvite  | 11.90              | 0.35           | **   | n.s.                     |

**Table S6.** PerMANOVA with Holm adjustment for multiple comparisons on Bray-Curtis distances to determine differences in lettuce root-associated bacterial community composition ( $\beta$ -diversity) and homogeneity of variances explained by root zone. Asterisks indicate level of significance:  $p < 0.01$  (\*\*) and  $p < 0.001$  (\*\*\*). n.s. = non significant.

|          |                                       | $\beta$ -diversity |                |      | Homogeneity of Variances |
|----------|---------------------------------------|--------------------|----------------|------|--------------------------|
|          |                                       | F                  | R <sup>2</sup> | p    |                          |
| Global   |                                       | 3.94               | 0.15           | ***  | n.s.                     |
| Pairwise | Rhizosphere - Rhizoplane              | 4.58               | 0.13           | **   | n.s.                     |
|          | Rhizosphere - Rhizoplane + Endosphere | 2.16               | 0.07           | n.s. | n.s.                     |
|          | Rhizoplane - Rhizoplane + Endosphere  | 5.15               | 0.15           | **   | n.s.                     |

**Table S7.** Indicator operational taxonomic units (OTU) for the lettuce root-associated bacterial community NPK control samples ordered by the indicator value. Multi-level pattern analysis (permutations = 10,000) with the "IndVal.g" indicator value index was utilized to identify the indicator OTUs. The specificity (A) indicates the probability that the sample belongs to the NPK control group, given that the OTU has been found in the sample. The fidelity (B) indicates the probability of finding the OTU in samples belonging to the NPK control group. P-values were adjusted for multiple testing with the Benjamini & Hochberg adjustment.

Asterisks indicate level of significance:  $p < 0.05$  (\*) and  $p < 0.01$  (\*\*). Total n = 48 and n per treatment group = 12.

| Family                     | Genus                                             | A (%) | B (%) | Indicator Value | Significance |
|----------------------------|---------------------------------------------------|-------|-------|-----------------|--------------|
| <i>Pseudomonadaceae</i>    | <i>Pseudomonas</i>                                | 97.74 | 100   | 0.99            | **           |
| <i>Rhodanobacteraceae</i>  | <i>Rhodanobacteraceae_unclassified</i>            | 86.29 | 91.67 | 0.89            | **           |
| <i>Enterobacteriaceae</i>  | <i>Pantoea</i>                                    | 90.91 | 83.33 | 0.87            | **           |
| <i>Burkholderiaceae</i>    | <i>Pandoraea</i>                                  | 100   | 75    | 0.87            | **           |
| <i>Sphingobacteriaceae</i> | <i>Mucilaginibacter</i>                           | 78.13 | 91.67 | 0.85            | **           |
| <i>Enterobacteriaceae</i>  | <i>Enterobacteriaceae_unclassified</i>            | 100   | 66.67 | 0.82            | **           |
| <i>Parachlamydiaceae</i>   | <i>Candidatus_Proteochlamydia</i>                 | 93.75 | 58.33 | 0.74            | **           |
| <i>Sphingomonadaceae</i>   | <i>Sphingomonadaceae_unclassified</i>             | 91.67 | 58.33 | 0.73            | **           |
| <i>Burkholderiaceae</i>    | <i>Burkholderia-Caballeronia-Paraburkholderia</i> | 100   | 50    | 0.71            | **           |
| <i>Sphingobacteriaceae</i> | <i>Mucilaginibacter</i>                           | 100   | 50    | 0.71            | **           |
| <i>Methylophilaceae</i>    | <i>Methylophilus</i>                              | 78.13 | 58.33 | 0.68            | *            |
| <i>Pseudomonadaceae</i>    | <i>Pseudomonas</i>                                | 100   | 41.67 | 0.65            | *            |
| <i>Burkholderiaceae</i>    | <i>Burkholderia-Caballeronia-Paraburkholderia</i> | 82.35 | 50    | 0.64            | *            |
| <i>Acidobacteriaceae_</i>  | <i>Granulicella</i>                               | 98.25 | 41.67 | 0.64            | *            |

**Table S8.** Top 20 indicator operational taxonomic units (OTU) for the lettuce root-associated bacterial community electro dialysis (ED) concentrate samples ordered by the indicator value. Multi-level pattern analysis (permutations = 10,000) with the "IndVal.g" indicator value index was utilized to identify the indicator OTUs. The specificity (A) indicates the probability that the sample belongs to the ED group, given that the OTU has been found in the sample. The fidelity (B) indicates the probability of finding the OTU in samples belonging to the ED group. P-values were adjusted for multiple testing with the Benjamini & Hochberg adjustment. Asterisks indicate level of significance:  $p < 0.01$  (\*\*). Total n = 48 and n per treatment group = 12.

| Family                     | Genus                                | A (%) | B (%) | Indicator Value | Significance |
|----------------------------|--------------------------------------|-------|-------|-----------------|--------------|
| <i>Devosiaceae</i>         | <i>Devosia</i>                       | 100   | 100   | 1               | **           |
| <i>Gemmatimonadaceae</i>   | <i>Gemmatimonas</i>                  | 100   | 100   | 1               | **           |
| <i>Leptospiraceae</i>      | <i>Leptospira</i>                    | 100   | 100   | 1               | **           |
| <i>Rhizobiaceae</i>        | <i>Aminobacter</i>                   | 100   | 100   | 1               | **           |
| <i>Rubinisphaeraceae</i>   | <i>SH-PL14</i>                       | 100   | 100   | 1               | **           |
| <i>Sphingomonadaceae</i>   | <i>Sphingomonas</i>                  | 100   | 100   | 1               | **           |
| <i>Spirosomaceae</i>       | <i>Arcicella</i>                     | 100   | 100   | 1               | **           |
| <i>Spirosomaceae</i>       | <i>Flectobacillus</i>                | 100   | 100   | 1               | **           |
| <i>Xanthomonadaceae</i>    | <i>Pseudoxanthomonas</i>             | 100   | 100   | 1               | **           |
| <i>Pseudomonadaceae</i>    | <i>Pseudomonas</i>                   | 99.90 | 100   | 0.999           | **           |
| <i>Sphingobacteriaceae</i> | <i>Pedobacter</i>                    | 99.89 | 100   | 0.999           | **           |
| <i>Xanthomonadaceae</i>    | <i>Pseudoxanthomonas</i>             | 99.86 | 100   | 0.999           | **           |
| <i>Methylophilaceae</i>    | <i>Methylophilus</i>                 | 99.81 | 100   | 0.999           | **           |
| <i>Aeromonadaceae</i>      | <i>Aeromonas</i>                     | 99.63 | 100   | 0.998           | **           |
| <i>Burkholderiaceae</i>    | <i>Pelomonas</i>                     | 99.51 | 100   | 0.998           | **           |
| <i>Burkholderiaceae</i>    | <i>Acidovorax</i>                    | 99.48 | 100   | 0.997           | **           |
| <i>Burkholderiaceae</i>    | <i>Burkholderiaceae_unclassified</i> | 99.44 | 100   | 0.997           | **           |
| <i>Burkholderiaceae</i>    | <i>Acidovorax</i>                    | 99.44 | 100   | 0.997           | **           |
| <i>Pseudomonadaceae</i>    | <i>Pseudomonas</i>                   | 99.35 | 100   | 0.997           | **           |
| <i>Spirosomaceae</i>       | <i>Emticicia</i>                     | 99.20 | 100   | 0.996           | **           |



**Table S9.** Top 20 indicator operational taxonomic units (OTU) for the lettuce root-associated bacterial community hydrolyzed urine samples ordered by the indicator value. Multi-level pattern analysis (permutations = 10,000) with the "IndVal.g" indicator value index was utilized to identify the indicator OTUs. The specificity (A) indicates the probability that the sample belongs to the hydrolyzed urine group, given that the OTU has been found in the sample. The fidelity (B) indicates the probability of finding the OTU in samples belonging to the hydrolyzed urine group. P-values were adjusted for multiple testing with the Benjamini & Hochberg adjustment. Asterisks indicate level of significance:  $p < 0.01$  (\*\*). Total  $n = 48$  and  $n$  per treatment group = 12.

| Family                    | Genus                                             | A (%) | B (%) | Indicator Value | Significance |
|---------------------------|---------------------------------------------------|-------|-------|-----------------|--------------|
| <i>Burkholderiaceae</i>   | <i>Burkholderiaceae_unclassified</i>              | 98.32 | 100   | 0.99            | **           |
| <i>Acidobacteriaceae</i>  | <i>Edaphobacter</i>                               | 94.69 | 100   | 0.97            | **           |
| <i>Micropepsaceae</i>     | <i>uncultured</i>                                 | 97.44 | 91.67 | 0.95            | **           |
| <i>Burkholderiaceae</i>   | <i>Eoetvoesia</i>                                 | 92.54 | 91.67 | 0.92            | **           |
| <i>Rhodocyclaceae</i>     | <i>Zoogloea</i>                                   | 100   | 83.33 | 0.91            | **           |
| JGI_0000069-P22_fa        | JGI_0000069-P22_ge                                | 88.32 | 91.67 | 0.90            | **           |
| <i>Solibacteriaceae</i>   | <i>Paludibaculum</i>                              | 96    | 83.33 | 0.89            | **           |
| <i>Burkholderiaceae</i>   | <i>Alicyclophilus</i>                             | 83.58 | 91.67 | 0.88            | **           |
| <i>Carnobacteriaceae</i>  | <i>uncultured</i>                                 | 100   | 75.00 | 0.87            | **           |
| <i>Rhodanobacteraceae</i> | <i>Rhodanobacter</i>                              | 72.83 | 100   | 0.85            | **           |
| <i>Holosporaceae</i>      | <i>uncultured</i>                                 | 86.67 | 83.33 | 0.85            | **           |
| <i>Burkholderiaceae</i>   | <i>Paenalcogenes</i>                              | 94.12 | 75    | 0.84            | **           |
| <i>Moraxellaceae</i>      | <i>Acinetobacter</i>                              | 93.55 | 75    | 0.84            | **           |
| <i>Burkholderiaceae</i>   | <i>Burkholderiaceae_unclassified</i>              | 92.98 | 75    | 0.84            | **           |
| FBP_fa                    | FBP_ge                                            | 92.31 | 75    | 0.83            | **           |
| <i>Burkholderiaceae</i>   | <i>Pigmentiphaga</i>                              | 81.82 | 83.33 | 0.83            | **           |
| <i>Rhodanobacteraceae</i> | <i>Rudaea</i>                                     | 100   | 66.67 | 0.82            | **           |
| <i>Burkholderiaceae</i>   | <i>Burkholderia-Caballeronia-Paraburkholderia</i> | 96.77 | 66.67 | 0.80            | **           |
| <i>Bdellovibrionaceae</i> | <i>Bdellovibrio</i>                               | 92.11 | 66.67 | 0.78            | **           |
| <i>Chitinophagaceae</i>   | <i>Sediminibacterium</i>                          | 100   | 58.33 | 0.76            | **           |

**Table S10.** Indicator operational taxonomic units (OTU) for the lettuce root-associated bacterial community K-struvite samples ordered by the indicator value. Multi-level pattern analysis (permutations = 10,000) with the "IndVal.g" indicator value index was utilized to identify the indicator OTUs. The specificity (A) indicates the probability that the sample belongs to the K-Struvite group, given that the OTU has been found in the sample. The fidelity (B) indicates the probability of finding the OTU in samples belonging to the K-Struvite group. P-values were adjusted for multiple testing with the Benjamini & Hochberg adjustment. Asterisks indicate level of significance:  $p < 0.05$  (\*) and  $p < 0.01$  (\*\*). Total  $n = 48$  and  $n$  per treatment group = 12.

| Family                                  | Genus                                   | A (%) | B (%) | Indicator Value | Significance |
|-----------------------------------------|-----------------------------------------|-------|-------|-----------------|--------------|
| <i>Enterobacteriaceae</i>               | <i>Enterobacteriaceae_unclassified</i>  | 96.45 | 100   | 0.98            | **           |
| <i>Burkholderiaceae</i>                 | <i>Thiomonas</i>                        | 92.50 | 100   | 0.96            | **           |
| <i>Rhodanobacteraceae</i>               | <i>Rhodanobacter</i>                    | 99.39 | 75    | 0.86            | **           |
| <i>Enterobacteriaceae</i>               | <i>Enterobacteriaceae_unclassified</i>  | 98.04 | 58.33 | 0.76            | **           |
| <i>Xanthomonadaceae</i>                 | <i>Stenotrophomonas</i>                 | 90    | 58.33 | 0.72            | **           |
| <i>Rhodanobacteraceae</i>               | <i>Rhodanobacteraceae_unclassified</i>  | 94.55 | 50    | 0.69            | **           |
| <i>Gammaproteobacteria_unclassified</i> | <i>Gammaproteobacteria_unclassified</i> | 100   | 41.67 | 0.65            | *            |
| <i>Burkholderiaceae</i>                 | <i>Burkholderiaceae_unclassified</i>    | 80    | 50    | 0.63            | *            |
| <i>Enterobacteriaceae</i>               | <i>Enterobacteriaceae_unclassified</i>  | 90    | 41.67 | 0.61            | *            |

**Table S11.** The top 10 genera ordered by node degree in the lettuce root-associated bacterial community networks grouped per urine-derived fertilizer treatment. The degree of a node is the number of adjacent edges (ED: electrodialysis).

| #  | NPK Control                                                 |        | ED Concentrate                                   |        | Hydrolyzed Urine                                  |        | K-Struvite                                                               |        |
|----|-------------------------------------------------------------|--------|--------------------------------------------------|--------|---------------------------------------------------|--------|--------------------------------------------------------------------------|--------|
|    | Genus                                                       | Degree | Genus                                            | Degree | Genus                                             | Degree | Genus                                                                    | Degree |
| 1  | <i>Rhodanobacteraceae_</i><br><i>unclassified</i>           | 6      | <i>Cupriavidus</i>                               | 11     | <i>Sphingobium</i>                                | 8      | <i>Allorhizobium-<br/>Neorhizobium-<br/>Pararhizobium-<br/>Rhizobium</i> | 5      |
| 2  | <i>Enterobacteriaceae_</i><br><i>unclassified</i>           | 5      | <i>Burkholderiaceae_</i><br><i>unclassified</i>  | 11     | <i>JGI_0000069-P22_ge</i>                         | 8      | <i>Herbaspirillum</i>                                                    | 5      |
| 3  | <i>Pandoraea</i>                                            | 5      | <i>Chlamydiales_</i><br><i>unclassified</i>      | 11     | <i>Enterobacteriaceae_</i><br><i>unclassified</i> | 7      | <i>Sphingomonas</i>                                                      | 5      |
| 4  | <i>Pseudomonas</i>                                          | 5      | <i>Massilia</i>                                  | 10     | <i>Stenotrophomonas</i>                           | 7      | <i>Enterobacteriaceae_</i><br><i>unclassified</i>                        | 5      |
| 5  | <i>Cupriavidus</i>                                          | 5      | <i>Azospirillum</i>                              | 10     | <i>Massilia</i>                                   | 7      | <i>Burkholderia-<br/>Caballeronia-<br/>Paraburkholderia</i>              | 4      |
| 6  | <i>Hyphomicrobium</i>                                       | 5      | <i>Fimbriimonadaceae_</i><br><i>unclassified</i> | 10     | <i>uncultured<br/>Holosporaceae</i>               | 7      | <i>Luteibacter</i>                                                       | 4      |
| 7  | <i>Pseudomonas</i>                                          | 5      | <i>Methylophilus</i>                             | 10     | <i>Rhodopseudomonas</i>                           | 7      | <i>Cupriavidus</i>                                                       | 4      |
| 8  | <i>Burkholderia-<br/>Caballeronia-<br/>Paraburkholderia</i> | 5      | <i>Kaistia</i>                                   | 10     | <i>Burkholderiaceae_</i><br><i>unclassified</i>   | 7      | <i>Xanthobacteraceae_</i><br><i>unclassified</i>                         | 4      |
| 9  | <i>Pseudomonas</i>                                          | 4      | <i>Caulobacteraceae_</i><br><i>unclassified</i>  | 10     | <i>Spirosoma</i>                                  | 7      | <i>Aminobacter</i>                                                       | 4      |
| 10 | <i>Rhodanobacter</i>                                        | 4      | <i>Hydrogenophaga</i>                            | 10     | <i>Pseudomonas</i>                                | 6      | <i>Burkholderia-<br/>Caballeronia-<br/>Paraburkholderia</i>              | 4      |

**Table S12.** The top 10 hubs ordered by Kleinberg's hub centrality score in the lettuce root-associated bacterial community networks grouped per urine-derived fertilizer treatment (ED: electrodialysis).

| #  | NPK Control                                                                                |           | ED Concentrate                                   |           | Hydrolyzed Urine                                  |           | K-Struvite                                                              |           |
|----|--------------------------------------------------------------------------------------------|-----------|--------------------------------------------------|-----------|---------------------------------------------------|-----------|-------------------------------------------------------------------------|-----------|
|    | Genus                                                                                      | Hub Score | Genus                                            | Hub Score | Genus                                             | Hub Score | Genus                                                                   | Hub Score |
| 1  | <i>Rhodanobacteraceae_</i><br><i>unclassified</i>                                          | 1         | <i>Sphingomonadaceae_</i><br><i>unclassified</i> | 1         | <i>JGI_0000069-P22_ge</i>                         | 1         | <i>Enterobacteriaceae_</i><br><i>unclassified</i>                       | 1         |
| 2  | <i>Mycobacterium</i>                                                                       | 0.81      | <i>Massilia</i>                                  | 0.98      | <i>Spirosoma</i>                                  | 0.88      | <i>Pseudomonas</i>                                                      | 0.83      |
| 3  | <i>Cupriavidus</i>                                                                         | 0.81      | <i>Nubsella</i>                                  | 0.96      | <i>Mucilaginibacter</i>                           | 0.69      | <i>Burkholderia-</i><br><i>Caballeronia-</i><br><i>Paraburkholderia</i> | 0.74      |
| 4  | <i>Allorhizobium-</i><br><i>Neorhizobium-</i><br><i>Pararhizobium-</i><br><i>Rhizobium</i> | 0.67      | <i>Rhizobiaceae_</i><br><i>unclassified</i>      | 0.95      | <i>Gemmata</i>                                    | 0.65      | <i>Pseudomonas</i>                                                      | 0.63      |
| 5  | <i>Allorhizobium-</i><br><i>Neorhizobium-</i><br><i>Pararhizobium-</i><br><i>Rhizobium</i> | 0.45      | <i>Chlamydiales_</i><br><i>unclassified</i>      | 0.91      | <i>Massilia</i>                                   | 0.61      | <i>Xanthobacteraceae_</i><br><i>unclassified</i>                        | 0.56      |
| 6  | <i>Pandoraea</i>                                                                           | 0.37      | <i>Azospirillum</i>                              | 0.89      | <i>Paludibaculum</i>                              | 0.60      | <i>Pseudomonas</i>                                                      | 0.54      |
| 7  | <i>Luteibacter</i>                                                                         | 0.33      | <i>NS9_marine_group_ge</i>                       | 0.87      | <i>Burkholderiaceae_</i><br><i>unclassified</i>   | 0.60      | <i>Enterobacteriaceae_</i><br><i>unclassified</i>                       | 0.46      |
| 8  | <i>Herbaspirillum</i>                                                                      | 0.32      | <i>Methylophilus</i>                             | 0.87      | <i>Enterobacteriaceae_</i><br><i>unclassified</i> | 0.59      | <i>Sphingomonas</i>                                                     | 0.42      |
| 9  | <i>Leifsonia</i>                                                                           | 0.28      | <i>Hydrogenophaga</i>                            | 0.87      | <i>Stenotrophomonas</i>                           | 0.59      | <i>Herbaspirillum</i>                                                   | 0.37      |
| 10 | <i>Burkholderia-</i><br><i>Caballeronia-</i><br><i>Paraburkholderia</i>                    | 0.27      | <i>Candidatus_</i><br><i>Protochlamydia</i>      | 0.86      | <i>Bdellovibrio</i>                               | 0.58      | <i>Burkholderiaceae_</i><br><i>unclassified</i>                         | 0.32      |

**Table S13.** The top 10 genera ordered by node degree in the lettuce root-associated bacterial community networks grouped per root zone. The degree of a node is the number of adjacent edges.

| #  | Rhizosphere                                                             |        | Rhizoplane                                                              |        | Rhizoplane + Endosphere                                                                    |        |
|----|-------------------------------------------------------------------------|--------|-------------------------------------------------------------------------|--------|--------------------------------------------------------------------------------------------|--------|
|    | Genus                                                                   | Degree | Genus                                                                   | Degree | Genus                                                                                      | Degree |
| 1  | <i>Fimbrimonadaceae_</i><br><i>unclassified</i>                         | 11     | <i>Pandoraea</i>                                                        | 9      | <i>Pseudomonas</i>                                                                         | 8      |
| 2  | <i>Burkholderia-</i><br><i>Caballeronia-</i><br><i>Paraburkholderia</i> | 10     | <i>Burkholderia-</i><br><i>Caballeronia-</i><br><i>Paraburkholderia</i> | 9      | <i>Burkholderia-</i><br><i>Caballeronia-</i><br><i>Paraburkholderia</i>                    | 8      |
| 3  | <i>Reyranella</i>                                                       | 10     | <i>Hyphomicrobium</i>                                                   | 9      | <i>Massilia</i>                                                                            | 8      |
| 4  | <i>Hirschia</i>                                                         | 10     | <i>Sphingobium</i>                                                      | 9      | <i>Allorhizobium-</i><br><i>Neorhizobium-</i><br><i>Pararhizobium-</i><br><i>Rhizobium</i> | 7      |
| 5  | <i>Pseudomonas</i>                                                      | 9      | <i>Enterobacteriaceae_</i><br><i>unclassified</i>                       | 8      | <i>Burkholderia-</i><br><i>Caballeronia-</i><br><i>Paraburkholderia</i>                    | 7      |
| 6  | <i>Enterobacteriaceae_</i><br><i>unclassified</i>                       | 9      | <i>Enterobacteriaceae_</i><br><i>unclassified</i>                       | 8      | <i>Herbaspirillum</i>                                                                      | 7      |
| 7  | <i>Burkholderia-</i><br><i>Caballeronia-</i><br><i>Paraburkholderia</i> | 8      | <i>Enterobacteriaceae_</i><br><i>unclassified</i>                       | 8      | <i>Pelomonas</i>                                                                           | 7      |
| 8  | <i>Burkholderia-</i><br><i>Caballeronia-</i><br><i>Paraburkholderia</i> | 8      | <i>Burkholderia-</i><br><i>Caballeronia-</i><br><i>Paraburkholderia</i> | 7      | <i>Reyranella</i>                                                                          | 7      |
| 9  | <i>Luteibacter</i>                                                      | 8      | <i>Burkholderia-</i><br><i>Caballeronia-</i><br><i>Paraburkholderia</i> | 7      | <i>Devosia</i>                                                                             | 7      |
| 10 | <i>Aminobacter</i>                                                      | 8      | <i>Rhodanobacter</i>                                                    | 7      | <i>Sphingomonas</i>                                                                        | 7      |

**Table S14.** The top 10 hubs ordered by Kleinberg's hub centrality score in the lettuce root-associated bacterial community networks grouped per root zone.

| #  | Rhizosphere                                       |           | Rhizoplane                                        |           | Rhizoplane + Endosphere                                   |           |
|----|---------------------------------------------------|-----------|---------------------------------------------------|-----------|-----------------------------------------------------------|-----------|
|    | Genus                                             | Hub Score | Genus                                             | Hub Score | Genus                                                     | Hub Score |
| 1  | <i>Reyranella</i>                                 | 1         | <i>Hyphomicrobium</i>                             | 1         | <i>Allorhizobium-Neorhizobium-Pararhizobium-Rhizobium</i> | 1         |
| 2  | <i>Fimbriimonadaceae_unclassified</i>             | 0.80      | <i>Burkholderia-Caballeronia-Paraburkholderia</i> | 0.96      | <i>Burkholderia-Caballeronia-Paraburkholderia</i>         | 0.95      |
| 3  | <i>Burkholderia-Caballeronia-Paraburkholderia</i> | 0.74      | <i>Burkholderia-Caballeronia-Paraburkholderia</i> | 0.74      | <i>Pelomonas</i>                                          | 0.90      |
| 4  | <i>Hirschia</i>                                   | 0.70      | <i>Rhodanobacter</i>                              | 0.74      | <i>Sphingomonas</i>                                       | 0.86      |
| 5  | <i>Burkholderia-Caballeronia-Paraburkholderia</i> | 0.68      | <i>Devosia</i>                                    | 0.73      | <i>Burkholderia-Caballeronia-Paraburkholderia</i>         | 0.75      |
| 6  | <i>Aminobacter</i>                                | 0.66      | <i>Sphingobium</i>                                | 0.72      | <i>Fimbriimonadaceae_unclassified</i>                     | 0.74      |
| 7  | <i>Enterobacteriaceae_unclassified</i>            | 0.62      | <i>Dyadobacter</i>                                | 0.68      | <i>Sphingopyxis</i>                                       | 0.63      |
| 8  | <i>Burkholderia-Caballeronia-Paraburkholderia</i> | 0.57      | <i>Luteibacter</i>                                | 0.67      | <i>Sphingobium</i>                                        | 0.53      |
| 9  | <i>Xanthobacteraceae_unclassified</i>             | 0.56      | <i>Delftia</i>                                    | 0.61      | <i>Alkanibacter</i>                                       | 0.50      |
| 10 | <i>Spirosoma</i>                                  | 0.53      | <i>Sphingomonas</i>                               | 0.58      | <i>Devosia</i>                                            | 0.47      |

**Table S16.** Overview of the habitats and characteristics of the key genera and families in the lettuce root-associated bacterial communities fertilized with urine-derived fertilizer (ED: electrodialysis).

| Urine-Derived Fertilizer | Key Genera or Families  | Habitats                                                                  | Characteristics                                                                                                                                                                                                                                                                                                        | References   |
|--------------------------|-------------------------|---------------------------------------------------------------------------|------------------------------------------------------------------------------------------------------------------------------------------------------------------------------------------------------------------------------------------------------------------------------------------------------------------------|--------------|
| ED Concentrate           | <i>Cupriavidus</i>      | Detected in the rhizosphere of plants in alkaline soil.                   | <ul style="list-style-type: none"> <li>• N-fixing root nodule formation.</li> <li>• <i>Cupriavidus</i> is closely related to the <i>Ralstonia</i> genus, whose members are soil-borne pathogens causing bacterial wilt.</li> <li>• Increase shoot and root dry weight.</li> <li>• Phosphate solubilization.</li> </ul> | [78,116-120] |
|                          | <i>Caulobacteraceae</i> | Detected in the rhizosphere.                                              | <ul style="list-style-type: none"> <li>• Contains plant growth-promoting and inhibiting members.</li> </ul>                                                                                                                                                                                                            | [121]        |
|                          | <i>Kaistia</i>          | Detected in the tomato rhizosphere in alkaline soil.                      | <ul style="list-style-type: none"> <li>• Plant growth-promoting or inhibiting effects are not known.</li> </ul>                                                                                                                                                                                                        | [122]        |
|                          | <i>Devosia</i>          | Detected in the rhizosphere of an aquatic legume.                         | <ul style="list-style-type: none"> <li>• N-fixing root nodule formation.</li> </ul>                                                                                                                                                                                                                                    | [123]        |
|                          | <i>Gemmatimonas</i>     | Detected in rice paddies and the rhizosphere of artichoke in saline soil. | <ul style="list-style-type: none"> <li>• Play a role in organic matter decomposition.</li> </ul>                                                                                                                                                                                                                       | [124-126]    |
|                          | <i>Leptospira</i>       | Detected in inundated agricultural fields.                                | <ul style="list-style-type: none"> <li>• Members that cause zoonotic disease in humans exist. Infection commonly occurs through contact via soil or water contaminated with urine from an infected animal.</li> </ul>                                                                                                  | [127]        |
|                          | <i>Aminobacter</i>      | Detected in the rhizosphere.                                              | <ul style="list-style-type: none"> <li>• Root nodule formation.</li> <li>• Can use ammonia, nitrate, or urea as nitrogen sources.</li> </ul>                                                                                                                                                                           | [88,89]      |
|                          | <i>SH-PL14</i>          | Detected in the rhizosphere.                                              | <ul style="list-style-type: none"> <li>• <i>SH-PL14</i> is a member of the <i>Planctomycetales</i>, which is characterized by anaerobic oxidation of ammonium to N<sub>2</sub> (anammox).</li> </ul>                                                                                                                   | [90,91]      |



---

|                                                                    |                                                                          |                                                                                                                                                                                |           |
|--------------------------------------------------------------------|--------------------------------------------------------------------------|--------------------------------------------------------------------------------------------------------------------------------------------------------------------------------|-----------|
| <i>Sphingomonas</i>                                                | Detected in soil, aquatic, and saline environments, and the rhizosphere. | <ul style="list-style-type: none"> <li>• Plant growth-promotion.</li> <li>• N-fixation.</li> <li>• Phytohormone production.</li> </ul>                                         | [128]     |
| <i>Arcicella</i>                                                   | Detected in wetland and aquatic environments.                            | <ul style="list-style-type: none"> <li>• Plant growth-promoting or inhibiting effects are not known.</li> <li>• Can use nitrate and ammonium as nitrogen sources.</li> </ul>   | [129,130] |
| <i>Flectobacillus</i>                                              | Detected in rice paddy rhizosphere soil.                                 | <ul style="list-style-type: none"> <li>• <i>Flectobacillus</i> is closely related to the <i>Arcicella</i> genus.</li> <li>• Can solubilize phosphate and potassium.</li> </ul> | [92-94]   |
| <i>Pseudoxanthomonas</i>                                           | Detected in the rhizosphere and riverside soil.                          | <ul style="list-style-type: none"> <li>• Reduce nitrite but not nitrate to N<sub>2</sub>O.</li> <li>• Show nematostatic activity.</li> </ul>                                   | [131-134] |
| <i>Aeromonas</i>                                                   | Detected in aquatic environments and halophyte rhizospheres.             | <ul style="list-style-type: none"> <li>• Phytohormone production.</li> <li>• Contains human pathogenic members.</li> </ul>                                                     | [135-137] |
| <i>Acidovorax</i>                                                  | Detected in lettuce rhizosphere.                                         | <ul style="list-style-type: none"> <li>• Contains plant pathogenic members that cause bacterial leaf spots and bacterial fruit blotch.</li> </ul>                              | [85-87]   |
| <i>Pedobacter</i>                                                  | Detected in the rhizosphere and aquatic environments.                    | <ul style="list-style-type: none"> <li>• Nitrifying members exist.</li> </ul>                                                                                                  | [138-140] |
| <i>Nubsella</i>                                                    | Detected in an aquatic environment.                                      | <ul style="list-style-type: none"> <li>• <i>Nubsella</i> is closely related to the <i>Pedobacter</i> genus.</li> </ul>                                                         | [141]     |
| <i>Flavobacteriales</i><br>bacterium<br><i>NS9 marine</i><br>group | Detected in seawater.                                                    | <ul style="list-style-type: none"> <li>• Plant growth-promoting or inhibiting effects are not known.</li> </ul>                                                                | [142,143] |
| <i>Methylophilus</i>                                               | Detected in the rhizosphere of hydroponically grown lettuce.             | <ul style="list-style-type: none"> <li>• Phosphate solubilization.</li> <li>• Phytohormone production.</li> <li>• Siderophore production.</li> </ul>                           | [144,145] |
| <i>Fimbriimonadaceae</i>                                           | Detected in ginseng field soil.                                          | <ul style="list-style-type: none"> <li>• Plant growth-promoting or inhibiting effects are not known.</li> </ul>                                                                | [146]     |

---

|                     |                                                            |                                                                                                               |                                                                                                                                                                                                                            |                   |
|---------------------|------------------------------------------------------------|---------------------------------------------------------------------------------------------------------------|----------------------------------------------------------------------------------------------------------------------------------------------------------------------------------------------------------------------------|-------------------|
| Hydrolyzed<br>Urine | <i>Gracilibacteria</i><br>bacterium<br>JGI 0000069-<br>P22 | JGI 0000069-P22 has been detected in sea-water. <i>Gracilibacteria</i> has been detected in rhizosphere soil. | <ul style="list-style-type: none"> <li>Plant growth-promoting or inhibiting effects are not known.</li> </ul>                                                                                                              | [147,148]         |
|                     | <i>Holosporaceae</i>                                       | Detected aquatic environments and in the root endosphere of Miscanthus.                                       | <ul style="list-style-type: none"> <li>Can infect the unicellular ciliate <i>Paramecium</i>.</li> <li>Plant growth-promoting or inhibiting effects are not known.</li> </ul>                                               | [149,150]         |
|                     | <i>Zoogloea</i>                                            | Detected in forest soil and rice paddy soil.                                                                  | <ul style="list-style-type: none"> <li>N-fixation.</li> </ul>                                                                                                                                                              | [151,152]         |
|                     | <i>Eoetvoesia</i>                                          | Not yet detected in the root environment.                                                                     | <ul style="list-style-type: none"> <li>Plant growth-promoting or inhibiting effects are not known.</li> </ul>                                                                                                              | [153]             |
|                     | <i>Edaphobacter</i>                                        | Detected in forest soils and wheat rhizosphere.                                                               | <ul style="list-style-type: none"> <li>Plant growth-promoting or inhibiting effects are not known.</li> </ul>                                                                                                              | [154,155]         |
|                     | <i>FBP_ge</i>                                              | Detected in coastal-steppe soils.                                                                             | <ul style="list-style-type: none"> <li>Plant growth-promoting or inhibiting effects are not known.</li> </ul>                                                                                                              | [156]             |
|                     | <i>Acetobacter-<br/>aceae</i>                              | Detected in the rhizosphere.                                                                                  | <ul style="list-style-type: none"> <li>Salt tolerant members exist.</li> <li>N-fixing and nodule forming.</li> <li>Plant growth-promotion.</li> <li>Phosphate solubilization.</li> <li>Phytohormone production.</li> </ul> | [157-159]         |
|                     | <i>Massilia</i>                                            | Detected in the rhizosphere.                                                                                  | <ul style="list-style-type: none"> <li>Positively linked in abundance to high levels of <i>Rhizoctonia solani</i>.</li> <li>Antagonism towards <i>Phytophthora infestans</i>.</li> <li>Phytohormone production.</li> </ul> | [105-108,160]     |
|                     | <i>Ignavibacteria</i><br>bacterium<br>OPB56                | Detected in the rhizosphere of hydroponically grown durum wheat.                                              | <ul style="list-style-type: none"> <li>Plant growth-promoting or inhibiting effects are not known.</li> </ul>                                                                                                              | [161]             |
|                     | <i>Sphingobium</i>                                         | Detected in the rhizosphere of lettuce.                                                                       | <ul style="list-style-type: none"> <li>Can cause corky root of lettuce and is induced by free ammonia.</li> </ul>                                                                                                          | [102-104,162,163] |

|            |                           |                                                                                                                   |                                                                                                                                                                                                                                                                                                                                                                        |                  |
|------------|---------------------------|-------------------------------------------------------------------------------------------------------------------|------------------------------------------------------------------------------------------------------------------------------------------------------------------------------------------------------------------------------------------------------------------------------------------------------------------------------------------------------------------------|------------------|
|            |                           |                                                                                                                   | <ul style="list-style-type: none"> <li>• Can degrade allelopathic pterostilbene, produced by plants to inhibit fungal infection, limiting its effectiveness.</li> </ul>                                                                                                                                                                                                |                  |
|            | <i>Dyadobacter</i>        | Detected in the rhizosphere and aquatic environments.                                                             | <ul style="list-style-type: none"> <li>• Nitrate reduction.</li> <li>• Linked to Fusarium wilt and rice blast disease suppression.</li> </ul>                                                                                                                                                                                                                          | [109,110,164]    |
|            | <i>Reyranella</i>         | Detected in the rhizosphere of lettuce, in agricultural, forest, and desert soils, and a eutrophic lake.          | <ul style="list-style-type: none"> <li>• May promote the outbreak of bacterial wilt disease (<i>Ralstonia solanacearum</i>).</li> <li>• Nitrate reduction.</li> </ul>                                                                                                                                                                                                  | [99-101,165-167] |
| K-Struvite | <i>Rhodanobacteraceae</i> | Detected in the rhizosphere and nitrate-rich subsurface environments (e.g., aquifers). Endophyte in tomato roots. | <ul style="list-style-type: none"> <li>• Antagonism towards the root fungal pathogen <i>Fusarium solani</i>.</li> <li>• Antagonism towards bacterial wilt disease (<i>Ralstonia solanacearum</i>).</li> <li>• Promote plant growth under salt-stressed conditions.</li> <li>• Produces antioxidant enzymes.</li> <li>• Capable of complete denitrification.</li> </ul> | [111-113]        |
|            | <i>Enterobacteriaceae</i> | Detected in the rhizosphere.                                                                                      | <ul style="list-style-type: none"> <li>• Promote plant growth.</li> <li>• Antagonism towards the root fungal pathogen <i>Fusarium solani</i>.</li> <li>• Phytohormone production.</li> <li>• N-fixation.</li> <li>• Phosphate solubilization.</li> </ul>                                                                                                               | [78,114,115]     |
|            | <i>Thiomonas</i>          | Detected in the rhizosphere and arsenic-contaminated environments.                                                | <ul style="list-style-type: none"> <li>• Can oxidize sulfur, iron, and arsenic.</li> <li>• Use thiosulfate as an energy source.</li> </ul>                                                                                                                                                                                                                             | [168-170]        |
